# Supplementary material for: C-Methylenation of anilines and indoles with CO2 and hydrosilane using a pentanuclear zinc complex catalyst
Source: Royal Society of Chemistry journal article supplement (doi:10.1039/d1cc03675k), 2021-01-01
Supplement: d1cc03675k1.pdf [file d1cc03675k1.pdf]

Electronic Supplementary Information

**C-Methylenation of anilines and indoles with CO<sub>2</sub> and hydrosilane using a pentanuclear zinc complex catalyst**

Kazuto Takaishi,\* Hiroyasu Kosugi, Ritsuki Nishimura, Yuya Yamada, and Tadashi Ema\*

Division of Applied Chemistry, Graduate School of Natural Science and Technology, Okayama University, Tsushima, Okayama 700-8530, Japan

**Table of contents**

|    |                                                |     |
|----|------------------------------------------------|-----|
| 1. | General information                            | S2  |
| 2. | Synthesis of diarylmethanes                    | S3  |
| 3. | H <sub>2</sub> and HD generations              | S8  |
| 4. | DFT calculations                               | S15 |
| 5. | <sup>1</sup> H and <sup>13</sup> C NMR spectra | S16 |
| 6. | Coordinates of optimized structures            | S38 |
| 7. | References                                     | S45 |

## 1. General information

**Instrumentation.** Melting points were measured on a Yanaco melting point apparatus (uncorrected). NMR spectra were recorded on a JEOL JNM-ECS400 or a JEOL JEM-ECZ600R. Data are reported as follows: chemical shifts in ppm using the residual solvent peak as an internal standard, integration, multiplicity (s = singlet, d = doublet, t = triplet, sext = sextet, m = multiplet, dd = doublet of doublets, dt = doublet of triplets, ddd = doublet of double doublets, br = broadened), and coupling constants (Hz). High-resolution mass spectra were performed on a Bruker micrOTOF. TLC analyses were carried out on glass sheets coated with Merck Silica gel 60 F<sub>254</sub> (0.25 mm), and visualization was accomplished with UV light. Column chromatography was performed on silica gel (Fuji Silysia BW-127 ZH, 100–270 mesh) or aluminum oxide 90 active basic (Merck 01799-11, 70–230 mesh). Preparative GPC was performed on a LC-5060 HPLC system (Japan Analytical Industry) using a JAIGEL-1HH ( $\phi$  20 mm  $\times$  600 mm) and a JAIGEL-2HH ( $\phi$  20 mm  $\times$  600 mm) (Japan Analytical Industry). GC was measured on a GC-8A (Shimadzu) with a packed column, Shincarbon-ST 50/80 ( $\phi$  3 mm  $\times$  6 m) (Shinwa Chemical Industries).

**Materials.** Most reagents were purchased and used without further purification unless otherwise specified. Dry solvents were purchased from Kanto Chemical Co., Inc. Phenylsilane was dried over 3A molecular sieves. Aniline was purified by distillation under reduced pressure and dried over 3A molecular sieves. <sup>13</sup>C<sub>2</sub>O<sub>2</sub> (99%) was purchased from Taiyo Nippon Sanso Corporation.

**The full citation of reference 14:** M. J. Frisch, G. W. Trucks, H. B. Schlegel, G. E. Scuseria, M. A. Robb, J. R. Cheeseman, G. Scalmani, V. Barone, G. A. Petersson, H. Nakatsuji, X. Li, M. Caricato, A. V. Marenich, J. Bloino, B. G. Janesko, R. Gomperts, B. Mennucci, H. P. Hratchian, J. V. Ortiz, A. F. Izmaylov, J. L. Sonnenberg, D. Williams-Young, F. Ding, F. Lipparini, F. Egidi, J. Goings, B. Peng, A. Petrone, T. Henderson, D. Ranasinghe, V. G. Zakrzewski, J. Gao, N. Rega, G. Zheng, W. Liang, M. Hada, M. Ehara, K. Toyota, R. Fukuda, J. Hasegawa, M. Ishida, T. Nakajima, Y. Honda, O. Kitao, H. Nakai, T. Vreven, K. Throssell, J. A. Montgomery, Jr., J. E. Peralta, F. Ogliaro, M. J. Bearpark, J. J. Heyd, E. N. Brothers, K. N. Kudin, V. N. Staroverov, T. A. Keith, R. Kobayashi, J. Normand, K. Raghavachari, A. P. Rendell, J. C. Burant, S. S. Iyengar, J. Tomasi, M. Cossi, J. M. Millam, M. Klene, C. Adamo, R. Cammi, J. W. Ochterski, R. L. Martin, K. Morokuma, O. Farkas, J. B. Foresman, and D. J. Fox, *GAUSSIAN 16 (Revision C.01)*, Gaussian, Inc., Wallingford CT, 2019.

## 2. Synthesis of diarylmethanes

### General procedure for the synthesis of bis[4-(*N,N*-dimethylamino)phenyl]methane (**5**) from *N,N*-dimethylaniline (**4**)

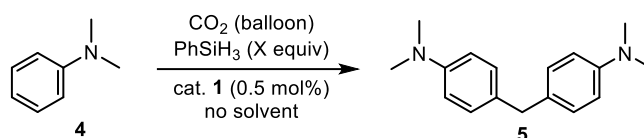

Catalyst **1** (3.0 mg, 1.3  $\mu$ mol, 0.5 mol% based on **4**) was put in a dry Schlenk flask (30 mL), and then *N,N*-dimethylaniline (**4**) (32  $\mu$ L, 0.25 mmol) was added. A CO<sub>2</sub> balloon (1 atm) was attached to the flask, and the flask was quickly evacuated and filled with CO<sub>2</sub>. The reaction mixture under CO<sub>2</sub> (1 atm) was stirred at reaction temperature for 10 min, and PhSiH<sub>3</sub> (3–6 equiv) was added via a syringe. The reaction mixture was stirred for reaction time. The yield was determined by using mesitylene as an internal standard after passing through a column (basic aluminum oxide, CHCl<sub>3</sub>), or the product was purified by GPC (CHCl<sub>3</sub>). Product **5** was characterized according to the literature.<sup>S1</sup>

<sup>1</sup>H NMR (600 MHz, CDCl<sub>3</sub>)  $\delta$  2.90 (s, 12H), 3.81 (s, 2H), 6.68 (d, *J* = 8.6 Hz, 4H), 7.05 (d, *J* = 8.6 Hz, 4H); <sup>13</sup>C NMR (151 MHz, CDCl<sub>3</sub>)  $\delta$  40.0, 41.1, 113.2, 129.5, 130.4, 148.2.

### Procedure for the synthesis of bis[4-(*N,N*-dimethylamino)phenyl]methane (**5**) from aniline (**6**)

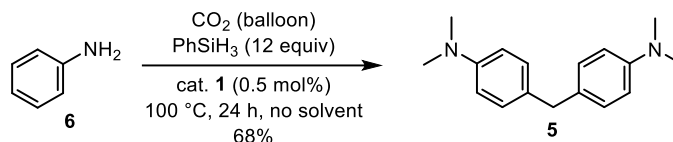

Catalyst **1** (3.0 mg, 1.3  $\mu$ mol, 0.5 mol%) was put in a dry two-necked flask (10 mL), and then aniline (**6**) (23  $\mu$ L, 0.25 mmol) was added. A CO<sub>2</sub> balloon (1 atm) was attached to the flask, and the flask was quickly evacuated and filled with CO<sub>2</sub>. The reaction mixture under CO<sub>2</sub> (1 atm) was stirred at 100 °C for 5 min, and PhSiH<sub>3</sub> (369  $\mu$ L, 3.00 mmol) was added via a syringe. The reaction mixture was stirred at 100 °C for 24 h. The mixture was diluted with a mixed solvent of hexane/EtOAc (3/1). After the insoluble components were filtered off, the filtrate was evaporated to give a residue. The product was purified by column chromatography (SiO<sub>2</sub>, hexane/EtOAc (3:1)) to afford **5** (21.7 mg, 85.3  $\mu$ mol, 68%) as a colorless solid.

### Procedure for the synthesis of <sup>13</sup>C-labeled bis[4-(*N,N*-dimethylamino)phenyl]methane (**5'**)

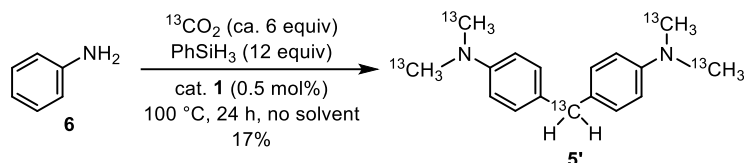

Catalyst **1** (3.0 mg, 1.3 μmol, 0.5 mol%) was put in a dry Schlenk flask (30 mL), and then aniline (**6**) (23 μL, 0.25 mmol) was added. A <sup>13</sup>CO<sub>2</sub> balloon (1 atm) was attached to the flask, and the flask was quickly evacuated and filled with <sup>13</sup>CO<sub>2</sub> (ca. 30 mL). The reaction mixture under <sup>13</sup>CO<sub>2</sub> was stirred at 100 °C for 5 min, and PhSiH<sub>3</sub> (369 μL, 3.00 mmol) was added via a syringe. The reaction mixture was stirred at 100 °C for 24 h. The mixture was passed through a basic aluminum oxide column (CHCl<sub>3</sub>) and then purified by silica gel column chromatography (hexane/EtOAc (9:1)) to afford **5'** (5.4 mg, 21 μmol, 17%) as a colorless solid.

**mp** 78–80 °C; **IR** (KBr) 3009, 2916, 2855, 1612, 1520, 1477, 1439, 1335, 1223, 1188, 1061, 934, 826, 795 cm<sup>-1</sup>; **<sup>1</sup>H NMR** (600 MHz, CDCl<sub>3</sub>) δ 2.90 (dd, *J* = 134.9, 4.3 Hz, 12H), 3.81 (d, *J* = 125.9 Hz, 2H), 6.68 (d, *J* = 8.8 Hz, 4H), 7.05 (dd, *J* = 8.7, 4.0 Hz, 4H); **<sup>13</sup>C NMR** (151 MHz, CDCl<sub>3</sub>) δ 40.0, 41.1, 113.2, 129.6 (d, *J* = 2.9 Hz), 130.5 (d, *J* = 44.8 Hz), 150.3 (d, *J* = 320.9 Hz); **HR MS** (ESI<sup>+</sup>) Calcd for <sup>12</sup>C<sub>12<sup>13</sup>C<sub>5</sub>H<sub>23</sub>N<sub>2</sub>: 260.2023 [M + H]<sup>+</sup>. Found: 260.2018.</sub>

### Procedure for the synthesis of bis[4-(*N,N*-dipropylamino)phenyl]methane (**8**) from *N,N*-dipropylaniline (**7**)

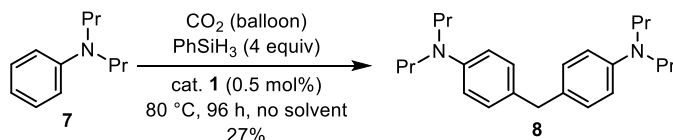

Catalyst **1** (3.0 mg, 1.3 μmol, 0.5 mol%) was put in a dry Schlenk flask (30 mL), and then *N,N*-dipropylaniline (**7**) (48 μL, 0.25 mmol) was added. A CO<sub>2</sub> balloon (1 atm) was attached to the flask, and the flask was quickly evacuated and filled with CO<sub>2</sub>. The reaction mixture under CO<sub>2</sub> (1 atm) was stirred at 80 °C for 5 min, and PhSiH<sub>3</sub> (123 μL, 1.00 mmol) was added via a syringe. The reaction mixture was stirred at 80 °C for 96 h. The mixture was passed through a basic aluminum oxide column (CHCl<sub>3</sub>) and then purified by silica gel column chromatography (hexane/EtOAc (20:1)) to afford **8** (12.3 mg, 33.6 μmol, 27%) as a colorless oil.

**IR** (neat) 3093, 2959, 2932, 2874, 1748, 1516, 1458, 1366, 1234, 1192, 1153, 1103, 799 cm<sup>-1</sup>; **<sup>1</sup>H NMR** (600 MHz, CDCl<sub>3</sub>) δ 0.90 (t, *J* = 7.4 Hz, 12H), 1.58 (sext, *J* = 7.5 Hz, 8H), 3.18 (t, *J* = 7.7 Hz, 8H), 3.76 (s, 2H), 6.56 (dt, *J* = 2.6, 8.8 Hz, 4H), 7.01 (dt, *J* = 2.7, 8.8 Hz, 4H); **<sup>13</sup>C NMR** (151 MHz, CDCl<sub>3</sub>) δ 11.6, 20.6, 39.8, 53.2, 112.0, 128.9, 129.6, 146.5; **HR MS** (ESI<sup>+</sup>) Calcd for C<sub>25</sub>H<sub>39</sub>N<sub>2</sub>: 367.3108 [M + H]<sup>+</sup>. Found: 367.3100.

### General procedure for the synthesis of diindolymethanes 10

Catalyst **1** (0.5 mol% based on **9**) was put in a dry Schlenk flask (30 mL), and then indole **9** (0.25 mmol) was added. A CO<sub>2</sub> balloon (1 atm) was attached to the flask, and the flask was quickly evacuated and filled with CO<sub>2</sub>. The reaction mixture under CO<sub>2</sub> (1 atm) was stirred at reaction temperature for 10 min, and PhSiH<sub>3</sub> (184 μL, 1.5 mmol) was added via a syringe. The reaction mixture was stirred for 24 h. The yield was determined by using mesitylene as an internal standard after short column chromatography (basic aluminum oxide, CHCl<sub>3</sub>), or the product was purified by GPC (CHCl<sub>3</sub>). Products **10a**<sup>S2</sup>, **10b**<sup>S3</sup>, **10c**<sup>S2</sup>, **10d**<sup>S4</sup>, **10e**<sup>S3</sup>, **10f**<sup>S2</sup>, and **10g**<sup>S2</sup> were characterized according to the literature.

**10a:** <sup>1</sup>H NMR (600 MHz, CDCl<sub>3</sub>) δ 3.71 (s, 6H), 4.22 (s, 2H), 6.79 (s, 2H), 7.09 (ddd, *J* = 0.9, 7.0, 7.9 Hz, 2H), 7.22 (ddd, *J* = 1.1, 7.0, 8.3 Hz, 2H), 7.30 (d, *J* = 8.2 Hz, 2H), 7.63 (d, *J* = 7.9 Hz, 2H); <sup>13</sup>C NMR (151 MHz, CDCl<sub>3</sub>) δ 21.1, 32.7, 109.2, 114.4, 118.7, 119.4, 121.5, 127.1, 128.0, 137.2.

**10b:** <sup>1</sup>H NMR (600 MHz, CDCl<sub>3</sub>) δ 2.45 (s, 6H), 3.69 (s, 6H), 4.16 (s, 2H), 6.73 (s, 2H), 7.05 (d, *J* = 8.3 Hz, 2H), 7.19 (d, *J* = 8.3 Hz, 2H), 7.42 (s, 2H); <sup>13</sup>C NMR (151 MHz, CDCl<sub>3</sub>) δ 21.0, 21.7, 32.8, 108.9, 113.9, 119.1, 123.1, 127.2, 127.9, 128.2, 135.7.

**10c:** <sup>1</sup>H NMR (600 MHz, CDCl<sub>3</sub>) δ 3.68 (s, 6H), 3.83 (s, 6H), 4.14 (s, 2H), 6.76 (s, 2H), 6.89 (dd, *J* = 2.4, 8.7 Hz, 2H), 7.07 (d, *J* = 2.4 Hz, 2H), 7.19 (d, *J* = 8.8 Hz, 2H); <sup>13</sup>C NMR (151 MHz, CDCl<sub>3</sub>) δ 21.1, 32.9, 56.2, 101.2, 110.0, 111.7, 113.8, 127.7, 128.2, 132.7, 153.7.

**10d:** <sup>1</sup>H NMR (600 MHz, CDCl<sub>3</sub>) δ 3.71 (s, 6H), 4.11 (s, 2H), 6.81 (s, 2H), 7.16 (d, *J* = 8.6 Hz, 2H), 7.20 (d, *J* = 8.6 Hz, 2H), 7.54 (s, 2H); <sup>13</sup>C NMR (151 MHz, CDCl<sub>3</sub>) δ 20.9, 33.0, 110.4, 113.6, 118.7, 121.9, 124.6, 128.3, 128.8, 135.7.

**10e:** <sup>1</sup>H NMR (600 MHz, CDCl<sub>3</sub>) δ 3.71 (s, 6H), 4.10 (s, 2H), 6.78 (s, 2H), 7.16 (d, *J* = 8.6 Hz, 2H), 7.29 (dd, *J* = 1.7, 8.6 Hz, 2H), 7.70 (d, *J* = 1.8 Hz, 2H); <sup>13</sup>C NMR (151 MHz, CDCl<sub>3</sub>) δ 20.9, 33.0, 110.8, 112.3, 113.6, 121.8, 124.5, 128.2, 129.5, 136.0.

**10f:** <sup>1</sup>H NMR (600 MHz, CDCl<sub>3</sub>) δ 0.91 (t, *J* = 7.3 Hz, 6H), 1.83 (sext, *J* = 7.3 Hz, 4H), 4.01 (t, *J* = 7.0 Hz, 4H), 4.24 (s, 2H), 6.85 (s, 2H), 7.07 (t, *J* = 7.4 Hz, 2H), 7.20 (d, *J* = 7.4 Hz, 2H), 7.32 (d, *J* = 8.2 Hz, 2H), 7.62 (d, *J* = 8.0 Hz, 2H); <sup>13</sup>C NMR (151 MHz, CDCl<sub>3</sub>) δ 11.7, 21.3, 23.8, 48.1, 109.4, 114.5, 118.6, 119.6, 121.4, 126.2, 128.4, 136.8.

**10g:** <sup>1</sup>H NMR (600 MHz, CDCl<sub>3</sub>) δ 2.38 (s, 6H), 3.65 (s, 6H), 4.15 (s, 2H), 6.96 (t, *J* = 7.4 Hz, 2H), 7.09 (d, *J* = 7.5 Hz, 2H), 7.21 (d, *J* = 8.2 Hz, 2H), 7.42 (d, *J* = 7.9 Hz, 2H); <sup>13</sup>C NMR (151 MHz, CDCl<sub>3</sub>) δ 10.5, 20.2, 29.6, 108.5, 110.6, 118.6, 118.7, 120.4, 128.4, 132.8, 136.9.

**Table S1** Optimization of the synthesis of diindolylmethane **10a**<sup>a</sup>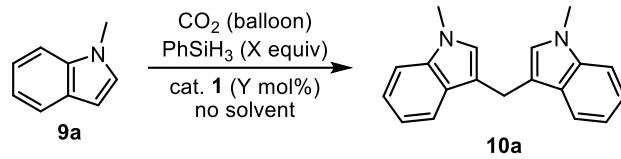

| Entry | X (equiv) | Y (mol%) | Temp (°C) | Yield (%) <sup>b</sup> |
|-------|-----------|----------|-----------|------------------------|
| 1     | 6         | 0.5      | 100       | 74                     |
| 2     | 6         | 0.5      | 90        | 92                     |
| 3     | 6         | 0.5      | 80        | 95 (94) <sup>c</sup>   |
| 4     | 6         | 0.5      | 70        | 89                     |
| 5     | 6         | 0.5      | 60        | 85                     |
| 6     | 6         | 0.5      | 40        | 0                      |
| 7     | 4         | 0.5      | 80        | 73                     |
| 8     | 6         | 0.2      | 80        | 10                     |

<sup>a</sup> Conditions: **9a** (0.25 mmol), CO<sub>2</sub> (1 atm, balloon), PhSiH<sub>3</sub> (amount indicated above), cat. **1** (amount indicated above), 24 h. <sup>b</sup> Determined by <sup>1</sup>H NMR using mesitylene as an internal standard. <sup>c</sup> Isolated yield.

**Procedure for the synthesis of unsymmetrical diarylmethane **11****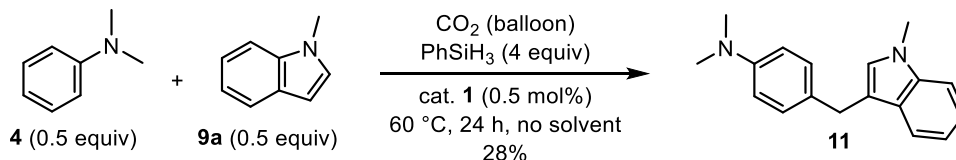

Catalyst **1** (3.0 mg, 1.3 μmol, 0.5 mol%) was put in a dry Schlenk flask (30 mL), and then *N,N*-dimethylaniline (**4**) (15.8 μL, 0.125 mmol) and 1-methylindole (**9a**) (15.6 μL, 0.125 mmol) were added. A CO<sub>2</sub> balloon (1 atm) was attached to the flask, and the flask was quickly evacuated and filled with CO<sub>2</sub>. The reaction mixture under CO<sub>2</sub> (1 atm) was stirred at 60 °C for 10 min, and PhSiH<sub>3</sub> (123 μL, 1.00 mmol) was added via a syringe. The reaction mixture was stirred at 60 °C for 24 h. The product was purified by column chromatography (basic aluminum oxide, CHCl<sub>3</sub>) and GPC (CHCl<sub>3</sub>) to afford **11** (9.3 mg, 0.041 mmol, 28%) as a yellow oil and **10a** (11.3 mg, 0.0352 mmol, 33%) as a pink solid. Product **11** was characterized according to the literature.<sup>S5</sup>

<sup>1</sup>H NMR (400 MHz, CDCl<sub>3</sub>) δ 2.92 (s, 6H), 3.73 (s, 3H), 4.02 (s, 2H), 6.73 (br s, 3H), 7.07 (ddd, *J* = 1.0, 6.9, 7.9 Hz, 1H), 7.10–7.25 (m, 3H), 7.28 (d, *J* = 8.2 Hz, 1H), 7.54 (d, *J* = 7.9 Hz, 1H); <sup>13</sup>C NMR (151 MHz, CDCl<sub>3</sub>) δ 30.6, 32.7, 41.1, 109.2, 113.1, 115.4, 118.7, 119.4, 121.5, 127.1, 128.0, 129.4, 129.7, 137.3, 149.2.

### Procedures for the control experiments (Scheme 5)

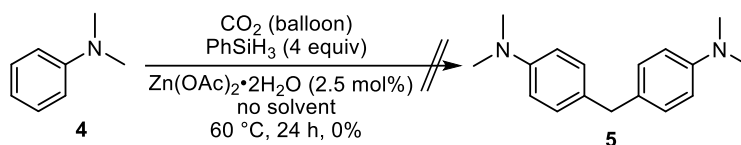

(a)  $\text{Zn}(\text{OAc})_2 \cdot 2\text{H}_2\text{O}$  (1.4 mg, 6.3  $\mu\text{mol}$ , 2.5 mol% based on **4**) was put in a dry Schlenk flask (30 mL), and then **4** (32  $\mu\text{L}$ , 0.25 mmol) was added. A  $\text{CO}_2$  balloon (1 atm) was attached to the flask, and the flask was quickly evacuated and filled with  $\text{CO}_2$ . The mixture under  $\text{CO}_2$  (1 atm) was stirred at 60  $^\circ\text{C}$  for 10 min, and  $\text{PhSiH}_3$  (123  $\mu\text{L}$ , 1.00 mmol) was added via a syringe. The reaction mixture was stirred at 60  $^\circ\text{C}$  for 24 h. The  $^1\text{H}$  NMR spectrum was measured after passing through a column (basic aluminum oxide,  $\text{CHCl}_3$ ), and compound **5** was not detected.

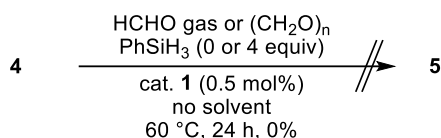

(b) The method using a formaldehyde gas: paraformaldehyde (121 mg, 4.0 mmol based on formaldehyde) was put in a dry two-necked flask (5 mL) and maintained at 120  $^\circ\text{C}$  under  $\text{N}_2$  atmosphere. The generated gas was guided to another dry two-necked flask (5 mL) containing a mixture of cat. **1** (3.0 mg, 1.3  $\mu\text{mol}$ , 0.5 mol% based on **4**), **4** (32  $\mu\text{L}$ , 0.25 mmol), and  $\text{PhSiH}_3$  (123  $\mu\text{L}$ , 1.00 mmol) by cannula transfer. The mixture was stirred at 60  $^\circ\text{C}$  for 24 h. The  $^1\text{H}$  NMR spectrum was measured after passing through a column (basic aluminum oxide,  $\text{CHCl}_3$ ), and compound **5** was not detected.

The method using paraformaldehyde: catalyst **1** (2.9 mg, 1.3  $\mu\text{mol}$ , 0.5 mol% based on **4**) was put in a dry Schlenk flask (30 mL), and then **4** (32  $\mu\text{L}$ , 0.25 mmol) and paraformaldehyde (30 mg, 1.0 mmol based on formaldehyde) was added. A  $\text{N}_2$  balloon (1 atm) was attached to the flask, and the flask was quickly evacuated and filled with  $\text{N}_2$ . The mixture was stirred at 60  $^\circ\text{C}$  for 10 min, and  $\text{PhSiH}_3$  (0 or 4 equiv) was added via a syringe. The reaction mixture was stirred at 60  $^\circ\text{C}$  for 24 h. The  $^1\text{H}$  NMR spectrum was measured after passing through a column (basic aluminum oxide,  $\text{CHCl}_3$ ), and compound **5** was not detected.

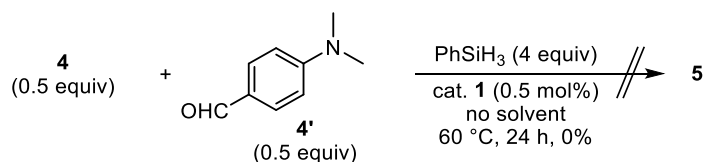

(c) Catalyst **1** (2.9 mg, 1.3  $\mu\text{mol}$ , 0.5 mol% based on **4** + **4'**) was put in a dry Schlenk flask (30 mL), and then **4** (16  $\mu\text{L}$ , 0.13 mmol) and **4'** (19 mg, 0.13 mmol) were added. A  $\text{N}_2$  balloon (1 atm) was attached to the flask, and the flask was quickly evacuated and filled with  $\text{N}_2$ . The mixture was stirred at 60  $^\circ\text{C}$  for 10 min, and  $\text{PhSiH}_3$  (123  $\mu\text{L}$ , 1.0 mmol) was added via a syringe. The reaction mixture was stirred at 60  $^\circ\text{C}$  for 24 h. The  $^1\text{H}$  NMR spectrum was measured after passing through a column (basic aluminum oxide,  $\text{CHCl}_3$ ), and compound **5** was not detected.

### 3. H<sub>2</sub> and HD generation reactions

#### General procedure for the H<sub>2</sub> generation reaction

To a solution of hydrosilane (0.75 mmol based on a number of Si–H bonds) and cat. **1** (0–0.9 mol%) in DMSO (200  $\mu$ L) was added ROH (3 equiv) at reaction temperature under N<sub>2</sub> atmosphere. The volume of the H<sub>2</sub> gas was measured by the water displacement method. The generation of H<sub>2</sub> gas was identified by <sup>1</sup>H NMR (CDCl<sub>3</sub>, 4.62 (s) ppm)<sup>S6</sup> (Fig. S1), GC (Fig. S2), and olefin hydrogenation (Scheme S1).

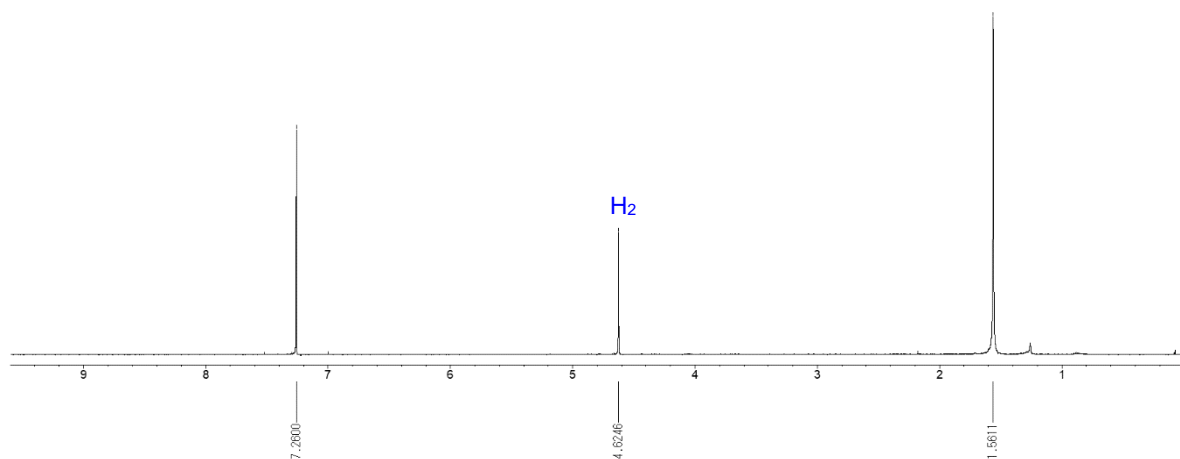

**Fig. S1** <sup>1</sup>H NMR spectrum of the produced gas (H<sub>2</sub>) (400 MHz, CDCl<sub>3</sub>). Reaction conditions: PhSiH<sub>3</sub> (0.25 mmol), H<sub>2</sub>O (3 equiv), cat. **1** (0.3 mol%), DMSO (200  $\mu$ L), rt (ca. 20 °C), 5 min.

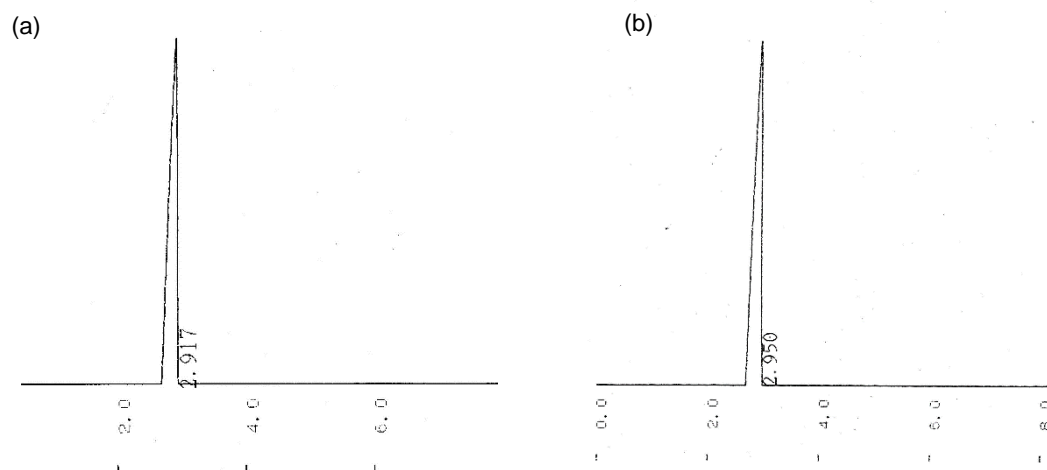

**Fig. S2** GC charts of (a) the produced gas and (b) authentic sample of H<sub>2</sub>. GC conditions: Shincarbon-ST 50/80 (Shinwa Chemical Industries),  $\phi$  3 mm  $\times$  6 m, Inj. 200 °C, Col. 70 °C, Det. (TCD) 200 °C, Ar. Reaction conditions: PhSiH<sub>3</sub> (0.25 mmol), H<sub>2</sub>O (3 equiv), cat. **1** (0.3 mol%), DMSO (200  $\mu$ L), rt (ca. 20 °C), 5 min.



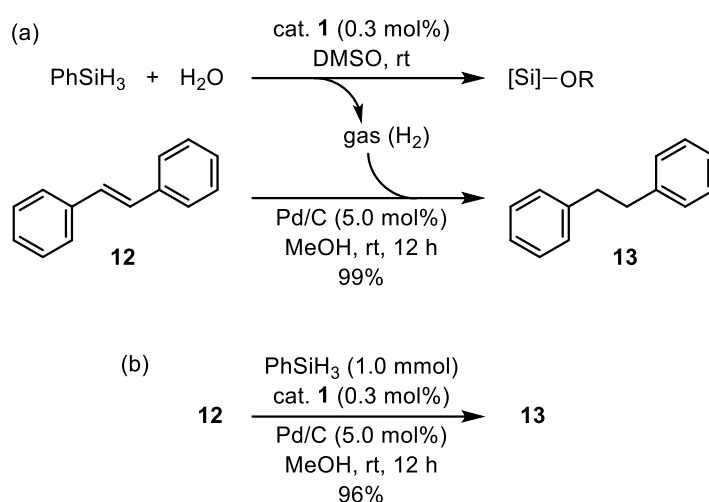

**Scheme S1** Synthesis of 1,2-diphenylethane (**13**) from *trans*-stilbene (**12**).

(a) To a solution of PhSiH<sub>3</sub> (126 μL, 1.02 mmol) and cat. **1** (24.1 mg, 11.0 μmol) in DMSO (800 μL), H<sub>2</sub>O (180 μL, 10.0 mmol) was added at room temperature under N<sub>2</sub> atmosphere. The generated gas was guided to a flask containing a mixture of **12** (45.1 mg, 250 μmol) and 10% Pd/C (22.5 mg) in MeOH (1.5 mL) by cannula transfer. The mixture was stirred at room temperature for 5 h. After Pd/C was filtered off, the filtrate was evaporated to afford **13** as a colorless powder. The yield was determined by using mesitylene as an internal standard (>99%). The NMR data were in agreement with those reported previously.<sup>S7</sup>

(b) To a mixture of **12** (45.6 mg, 253 μmol), cat. **1** (24.0 mg, 10.9 μmol), and 10% Pd/C (22.5 mg) in MeOH (1.5 mL) was added PhSiH<sub>3</sub> (126 μL, 1.02 mmol) at room temperature (ca. 20 °C) under N<sub>2</sub> atmosphere. The reaction mixture was stirred at room temperature for 12 h. After Pd/C was filtered off, the filtrate was evaporated to give a residue. The residue was purified by column chromatography (SiO<sub>2</sub>, CHCl<sub>3</sub>) to afford **13** (44.3 mg, 243 μmol, 96%) as a colorless powder.

### Screening of the H<sub>2</sub> generation reaction

We screened five reactants, ROHs, in the presence of 0.3 mol% of cat. **1** at room temperature for 5 min in DMSO (Table S2). When H<sub>2</sub>O or MeOH was used, H<sub>2</sub> gas generated quantitatively (entries 1–2), and the reaction finished within two and one minutes, respectively (Fig. S3). The bulky alcohols and phenol gave lower yields (42–65%, entries 3–5). A catalyst loading of 0.1 mol% was sufficient, although the reaction rate became somewhat slower (entry 6 and Fig. S4). The reaction did not proceed without cat. **1** (entry 7). The catalyst was recyclable without lowering the catalytic activity for at least five cycles, which demonstrates the robustness of cat. **1** (entry 8 and Fig. S5). The reaction was sensitive to temperature, and interestingly, it did not proceed at –10 °C without solidification (entry 9 and Fig. S6). In addition, we screened various hydrosilanes and confirmed that phenylsilane was the best choice (Table S3).

**Table S2** Hydrogen generation from phenylsilane and water or alcohols<sup>a</sup>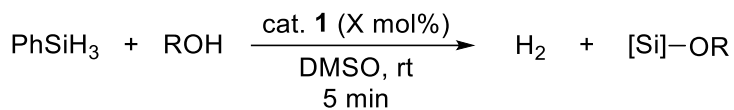

| Entry          | ROH               | X (mol%) | Yield of H <sub>2</sub> (%) <sup>b</sup> |
|----------------|-------------------|----------|------------------------------------------|
| 1              | H <sub>2</sub> O  | 0.3      | 99                                       |
| 2              | MeOH              | 0.3      | 99                                       |
| 3              | <sup>i</sup> PrOH | 0.3      | 65                                       |
| 4              | <sup>t</sup> BuOH | 0.3      | 42                                       |
| 5              | PhOH              | 0.3      | 54                                       |
| 6              | H <sub>2</sub> O  | 0.1      | 99                                       |
| 7              | H <sub>2</sub> O  | 0        | 0                                        |
| 8 <sup>c</sup> | H <sub>2</sub> O  | 0.9      | 99                                       |
| 9 <sup>d</sup> | H <sub>2</sub> O  | 0.3      | 0                                        |

<sup>a</sup> Conditions: PhSiH<sub>3</sub> (0.25 mmol), ROH (3 equiv based on the number of Si–H bonds), cat. **1** (amount indicated above), DMSO (200 μL), rt (ca. 20 °C), 5 min, N<sub>2</sub> atmosphere. <sup>b</sup> Determined by volume of H<sub>2</sub> collected by the water displacement method. <sup>c</sup> After four-time recycling of the catalyst. <sup>d</sup> –10 °C.

**Table S3** Hydrogen generation from various hydrosilanes and H<sub>2</sub>O<sup>a</sup>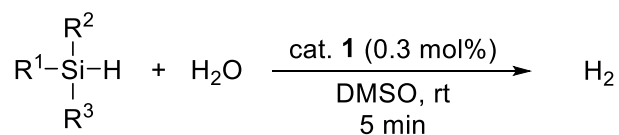

| Entry | Silane                           | Yield of H <sub>2</sub> (%) <sup>b</sup> |
|-------|----------------------------------|------------------------------------------|
| 1     | PhSiH <sub>3</sub>               | 99                                       |
| 2     | Ph <sub>2</sub> SiH <sub>2</sub> | 65                                       |
| 3     | Ph <sub>3</sub> SiH              | 0                                        |
| 4     | PhMe <sub>2</sub> SiH            | 0                                        |
| 5     | Ph <sub>2</sub> MeSiH            | 0                                        |
| 6     | PMHS                             | 0                                        |

<sup>a</sup> Conditions: Hydrosilane (0.25 mmol), H<sub>2</sub>O (3 equiv based on the number of Si–H bonds), cat. **1** (0.3 mol%), DMSO (200 μL), rt (ca. 20 °C), 5 min, N<sub>2</sub> atmosphere. <sup>b</sup> Determined by volume of H<sub>2</sub> collected by the water displacement method.

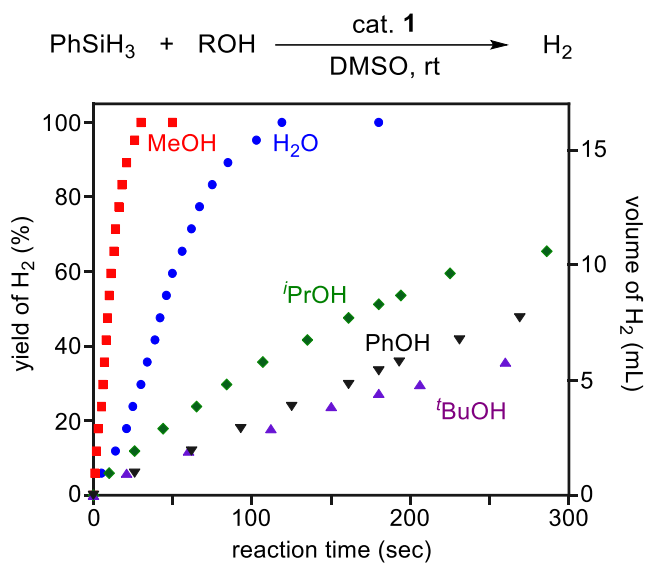

**Fig. S3** H<sub>2</sub> generation by the reaction of PhSiH<sub>3</sub> with ROH (H<sub>2</sub>O or alcohols). Conditions: PhSiH<sub>3</sub> (0.25 mmol), ROH (0.75 mmol), cat. **1** (0.3 mol%), DMSO (200 μL), rt (ca. 20 °C), N<sub>2</sub> atmosphere.

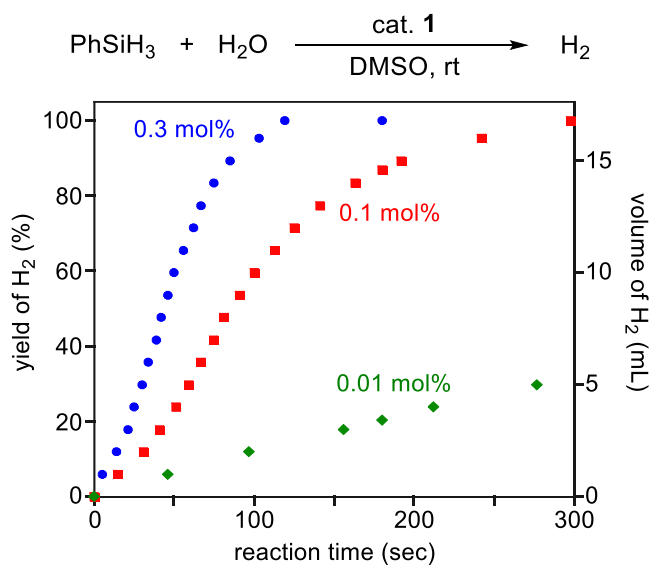

**Fig. S4** H<sub>2</sub> generation by the reaction of PhSiH<sub>3</sub> with H<sub>2</sub>O using various amounts of cat. **1**. Conditions: PhSiH<sub>3</sub> (0.25 mmol), H<sub>2</sub>O (0.75 mmol), cat. **1** (amount indicated above), DMSO (200 μL), rt (ca. 20 °C), N<sub>2</sub> atmosphere.

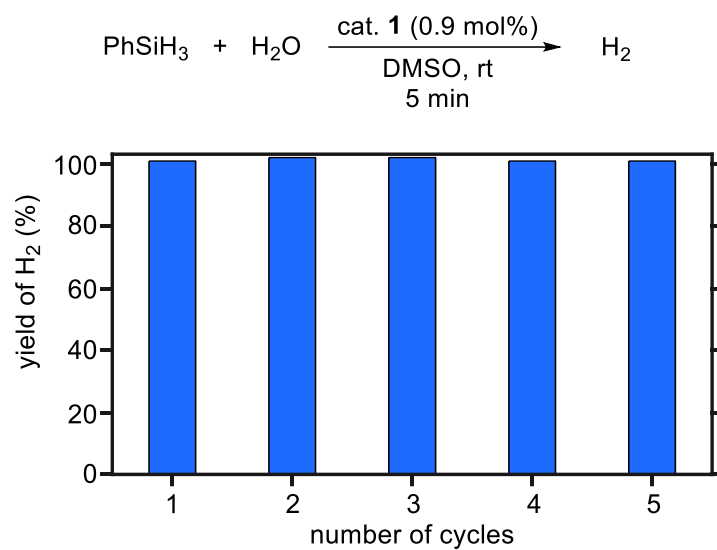

**Fig. S5** Reuse of cat. **1**. Conditions: PhSiH<sub>3</sub> (0.25 mmol), H<sub>2</sub>O (0.75 mmol), cat. **1** (0.9 mol%), DMSO (200 μL), rt (ca. 20 °C), 5 min, N<sub>2</sub> atmosphere.

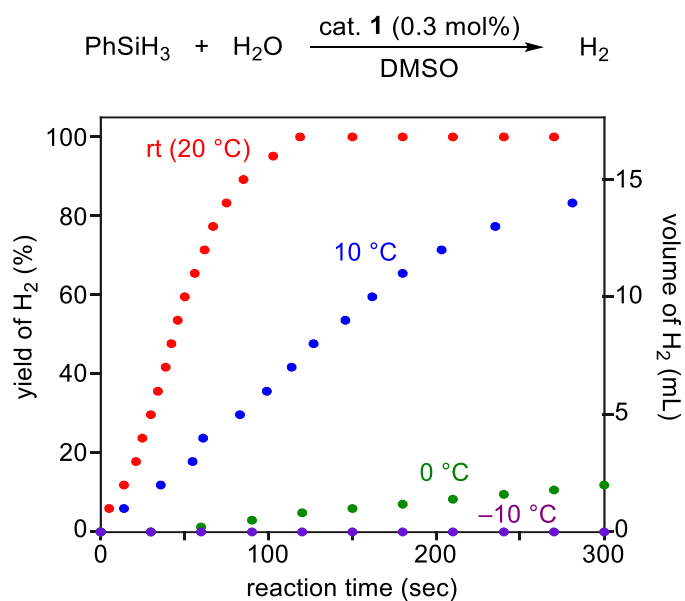

**Fig. S6** H<sub>2</sub> generation by the reaction of PhSiH<sub>3</sub> with H<sub>2</sub>O at various temperature. Conditions: PhSiH<sub>3</sub> (0.25 mmol), H<sub>2</sub>O (0.75 mmol), cat. **1** (0.3 mol%), DMSO (200 μL), N<sub>2</sub> atmosphere.

### General procedure for the HD gas generation reaction (Schemes 7b and 7c)

To a solution of  $\text{PhSiH}_3$  (32  $\mu\text{L}$ , 0.25 mmol) and cat. **1** (0.3 mol%) in DMSO (200  $\mu\text{L}$ ) was added ROD ( $\text{D}_2\text{O}$  (99.9% D) or  $\text{CD}_3\text{OD}$  (99.8% D), 10 equiv) at room temperature (ca. 20  $^\circ\text{C}$ ) under  $\text{N}_2$  atmosphere. The volume of the HD gas was measured by the water displacement method. The HD gas was identified by  $^1\text{H}$  NMR (Fig. S7).<sup>S8</sup>

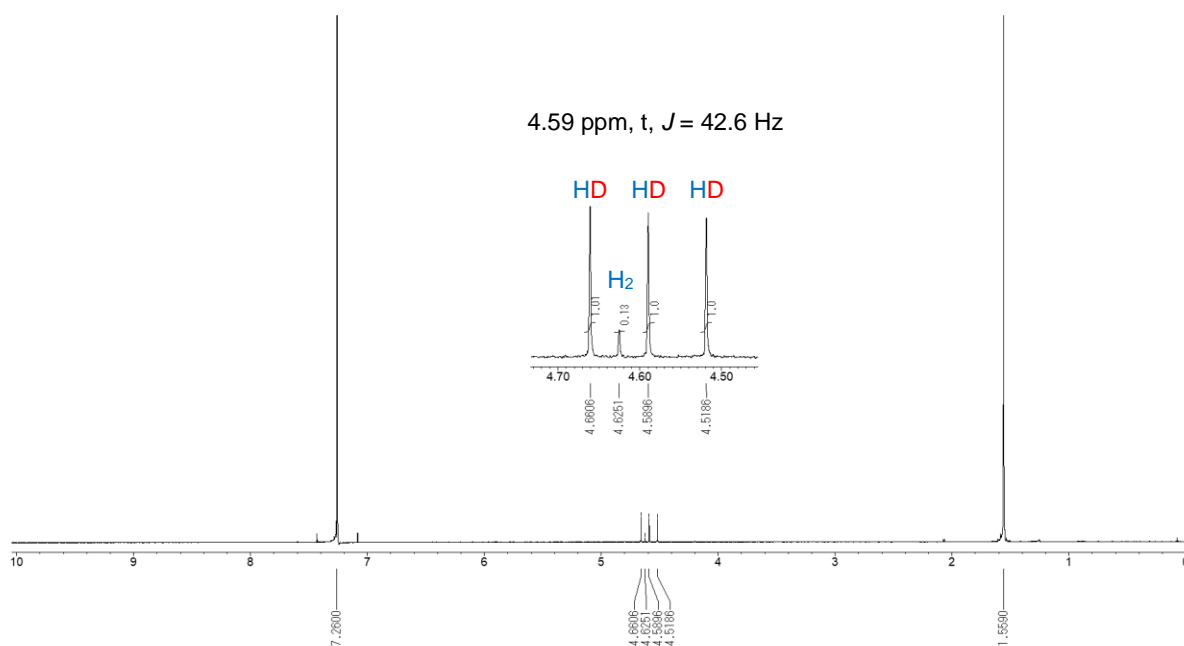

**Fig. S7**  $^1\text{H}$  NMR spectrum of the produced gas (600 MHz,  $\text{CDCl}_3$ ). Reaction conditions:  $\text{PhSiH}_3$  (0.25 mmol),  $\text{D}_2\text{O}$  (10 equiv), cat. **1** (0.3 mol%), DMSO (200  $\mu\text{L}$ ), rt (ca. 20  $^\circ\text{C}$ ), 5 min,  $\text{N}_2$  atmosphere.

### Procedure for the temperature-controllable $\text{H}_2$ gas generation reaction (Fig. 1)

To a solution of cat. **1** (0.3 mol%) in DMSO (200  $\mu\text{L}$ ) and  $\text{H}_2\text{O}$  (45  $\mu\text{L}$ , 2.5 mmol) at  $-10$   $^\circ\text{C}$  under  $\text{N}_2$  atmosphere,  $\text{PhSiH}_3$  (32  $\mu\text{L}$ , 0.25 mmol) was added, and the mixture solution was stirred for 15 min. The mixture was heated at 30  $^\circ\text{C}$  for 15 min. The volume of the  $\text{H}_2$  gas was measured by the water displacement method.

### General procedure for the stepwise H<sub>2</sub> gas generation reaction (Fig. S8 and S9)

To a solution of PhSiH<sub>3</sub> (246 μL, 2.0 mmol) and cat. **1** (0.2 mol%) in DMSO (1.6 mL) was added ROH (0.25 mmol) at room temperature (ca. 20 °C) under N<sub>2</sub> atmosphere. The volume of the H<sub>2</sub> gas was measured by the water displacement method. Additional portions of ROH (0.25 mmol) were added every 30 min (5 times).

We tried to control **1**-catalyzed H<sub>2</sub> generation by injection of H<sub>2</sub>O (Fig. S8). The sequential injection of H<sub>2</sub>O at 30 min intervals to a mixture of phenylsilane and cat. **1** in DMSO led to sequential and immediate H<sub>2</sub> generation at least five times. When MeOH was used instead of H<sub>2</sub>O, injection-responsive H<sub>2</sub> generation was also achieved (Fig. S9).

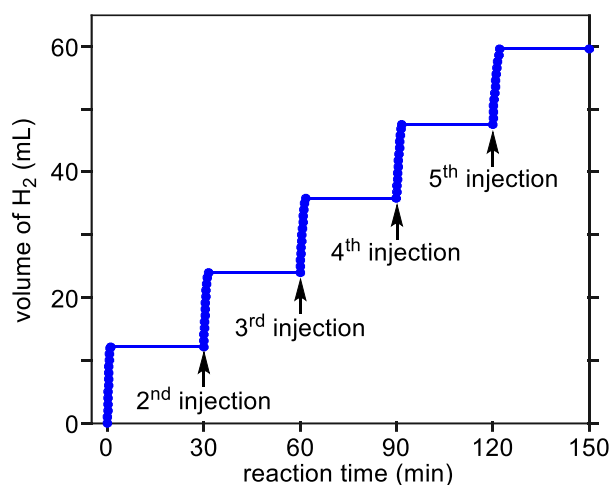

**Fig. S8** Generation of H<sub>2</sub> by sequential injection of H<sub>2</sub>O at 30 min intervals.

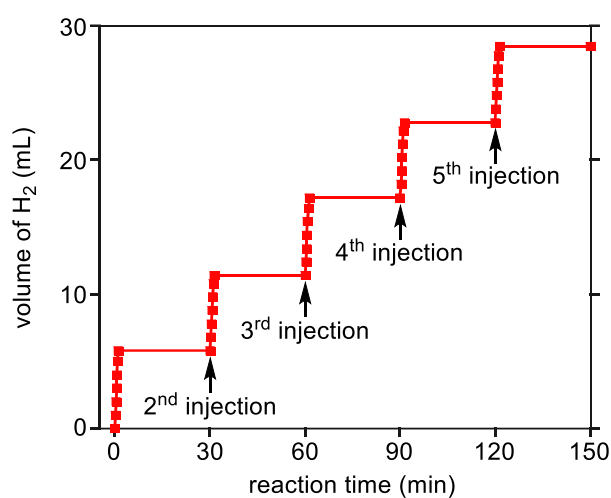

**Fig. S9** Generation of H<sub>2</sub> by sequential injection of MeOH at 30 min intervals.

#### 4. DFT calculations

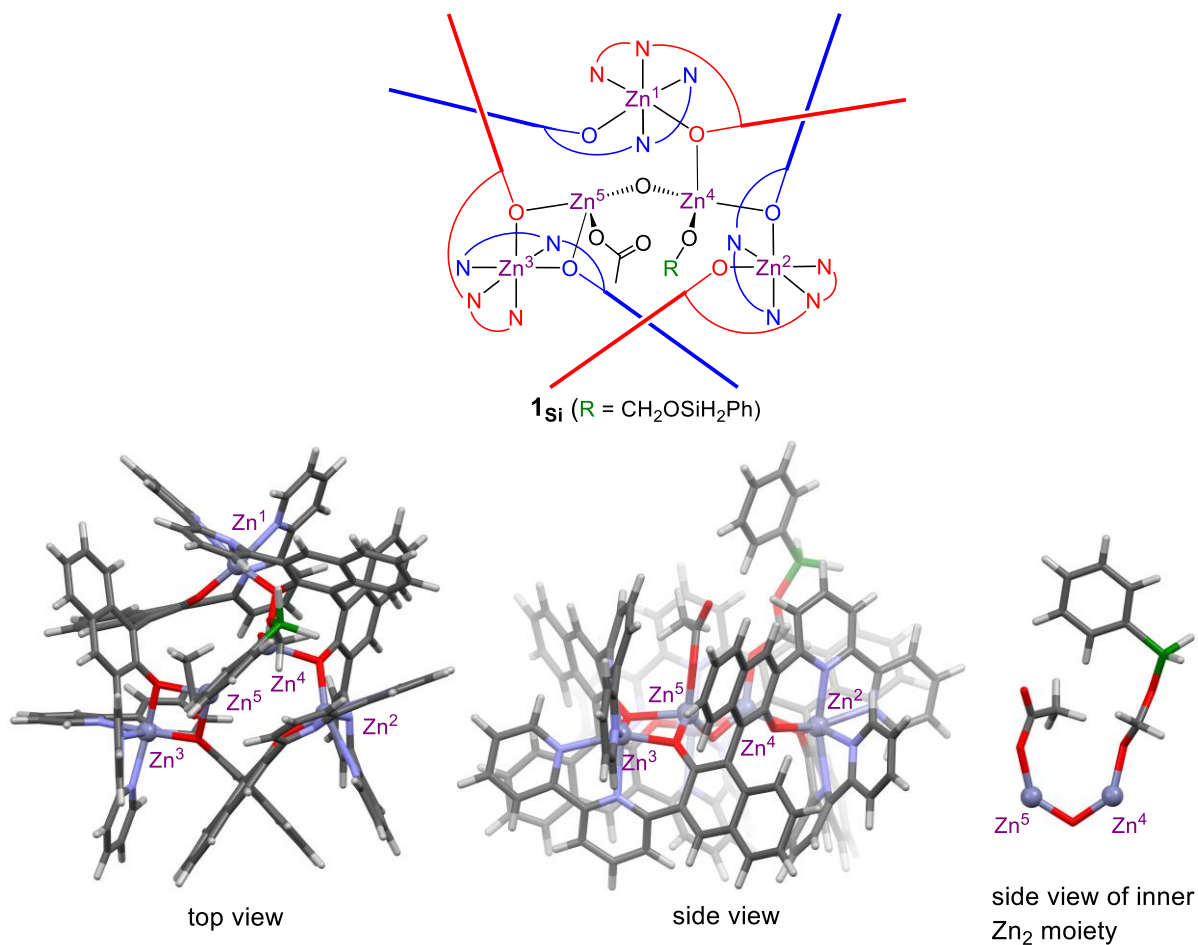

**Fig. S10** DFT-optimized structures of Zn<sup>II</sup> complex **1<sub>si</sub>** at the B3LYP/6-31G(d) level for the H, C, N, O, and Si atoms and at the B3LYP/LanL2DZ level for the Zn atoms.

## 5. $^1\text{H}$ and $^{13}\text{C}$ NMR spectra

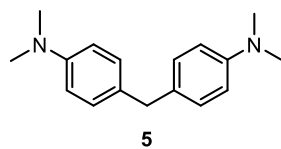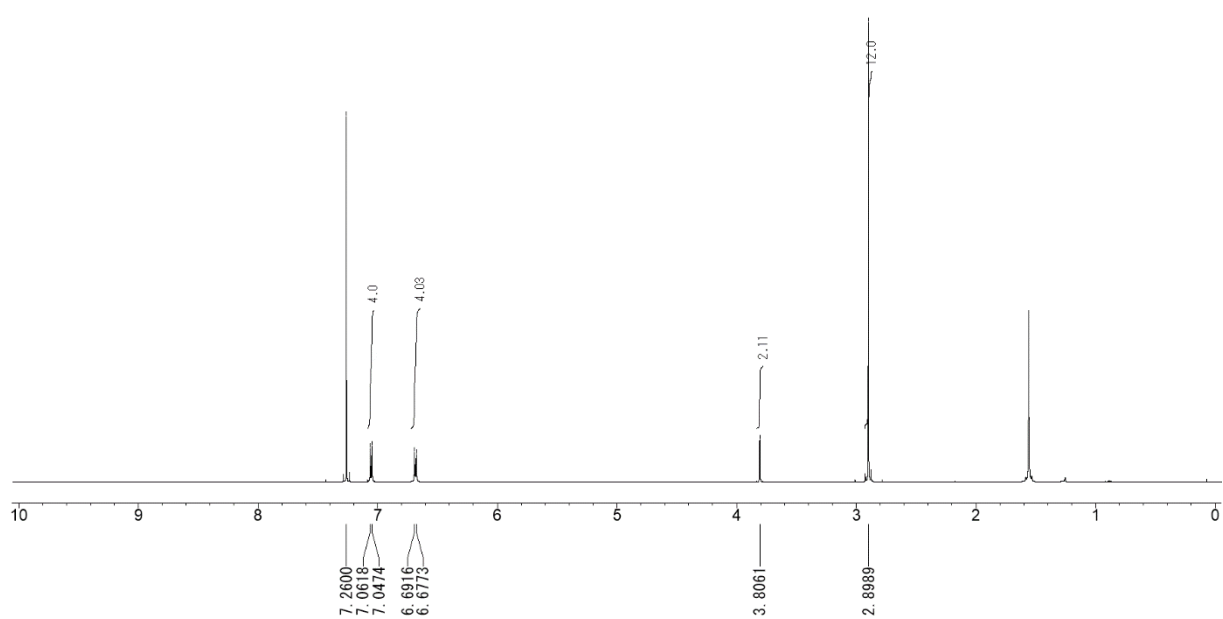

$^1\text{H}$  NMR spectrum of **5** (600 MHz,  $\text{CDCl}_3$ )



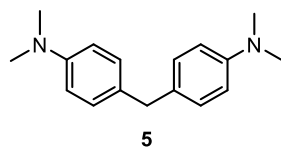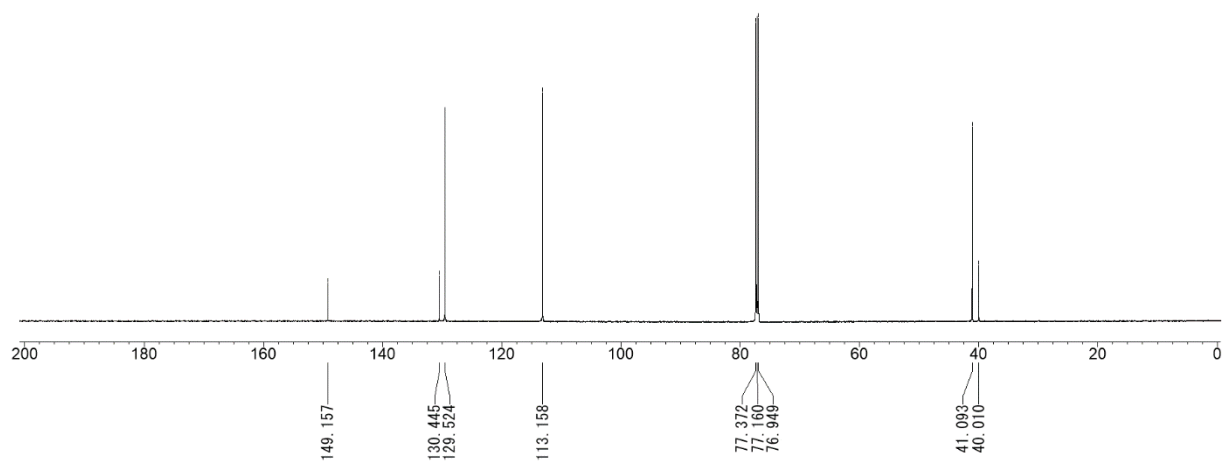

$^{13}\text{C}$  NMR spectrum of **5** (151 MHz,  $\text{CDCl}_3$ )

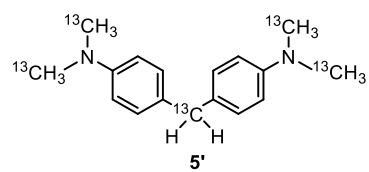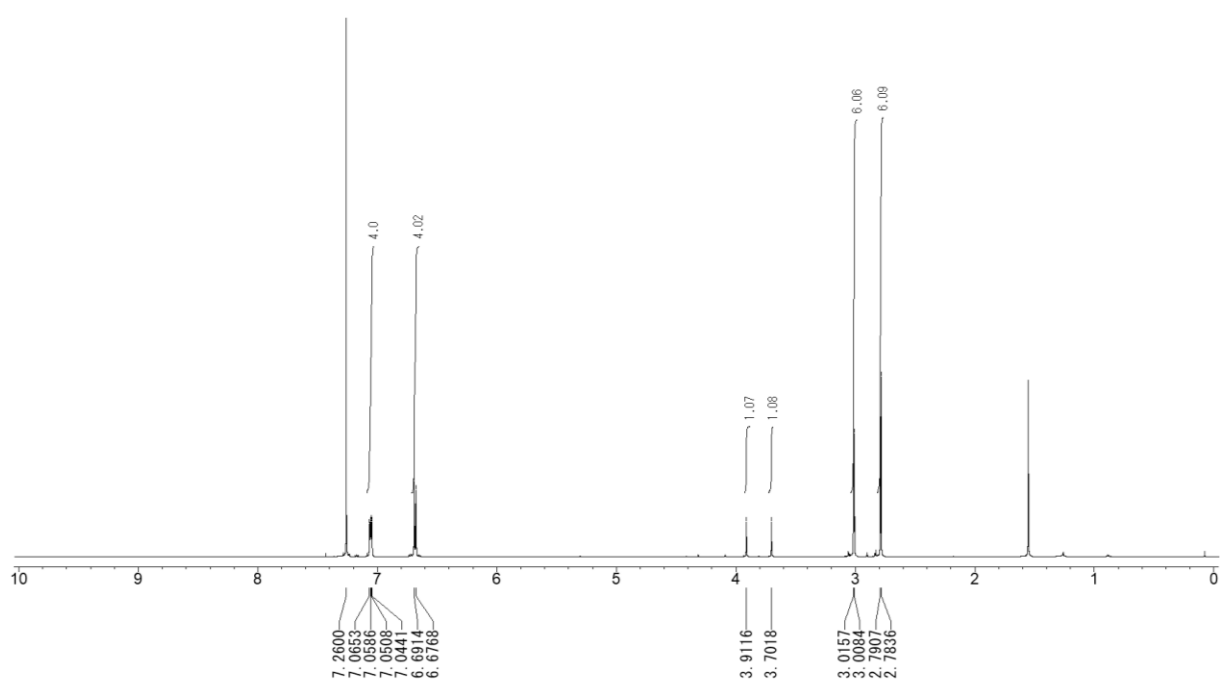

<sup>1</sup>H NMR spectrum of **5'** (600 MHz, CDCl<sub>3</sub>)

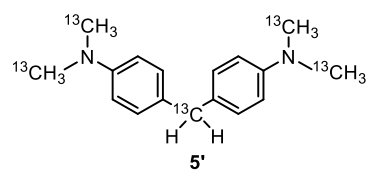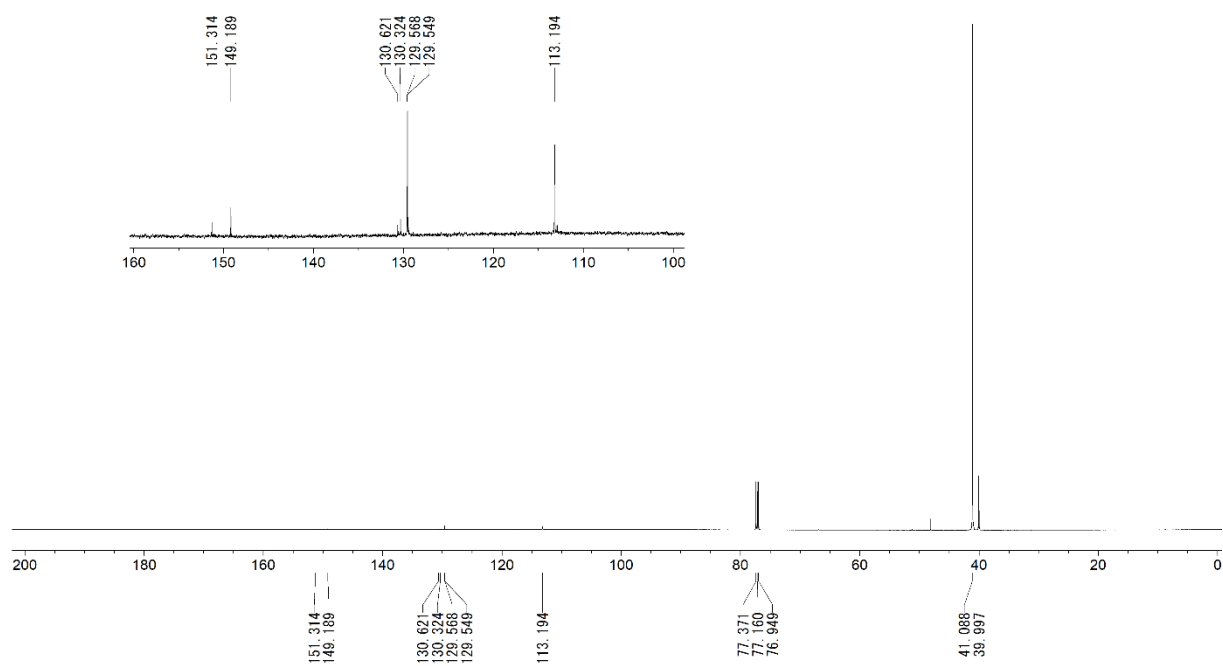

$^{13}\text{C}$  NMR spectrum of **5'** (151 MHz,  $\text{CDCl}_3$ )

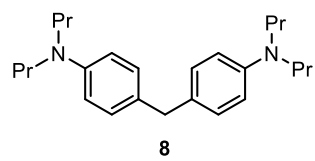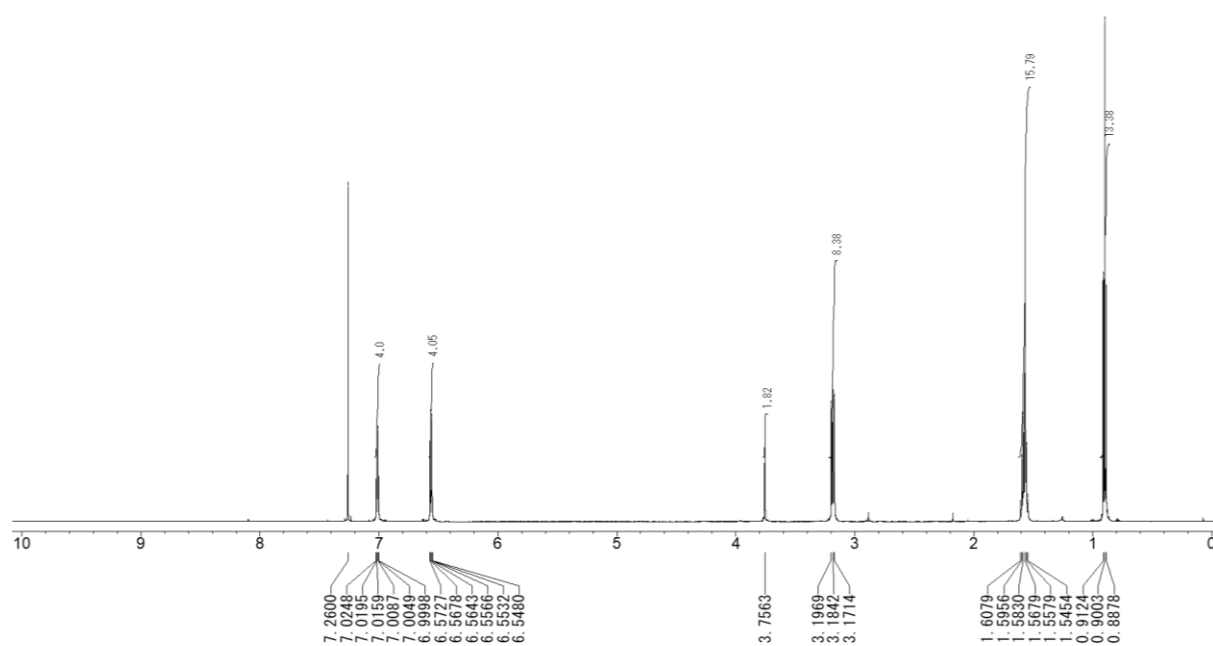

<sup>1</sup>H NMR spectrum of **8** (600 MHz, CDCl<sub>3</sub>)

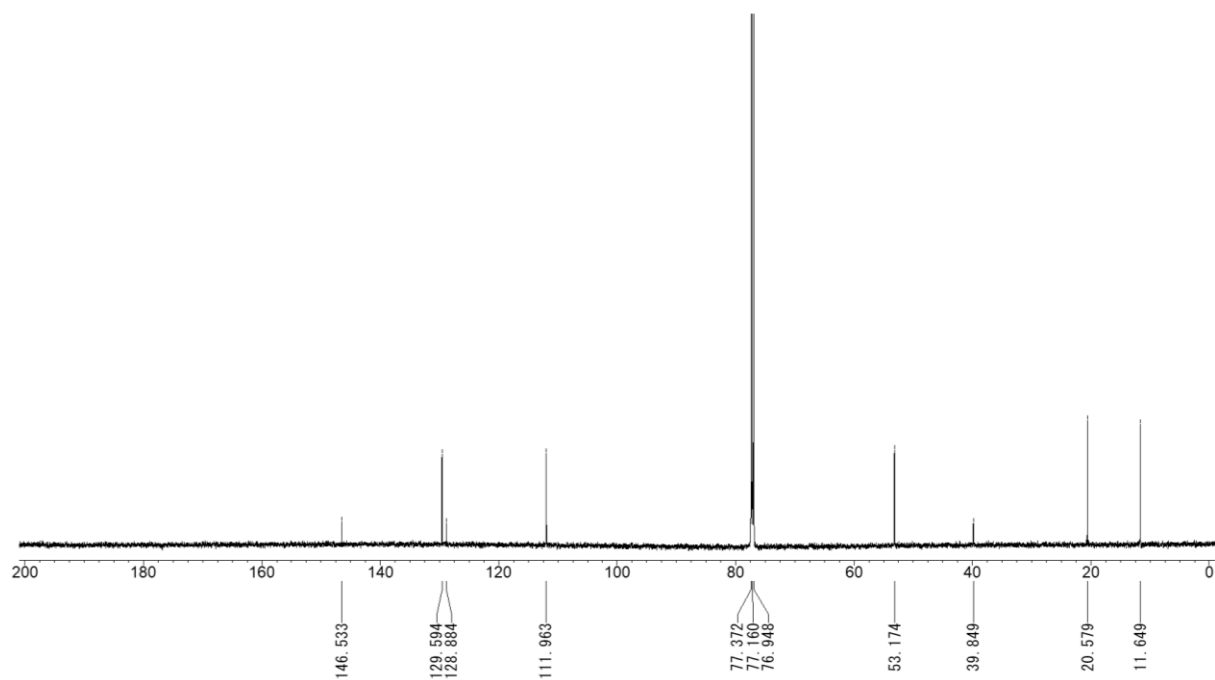

$^{13}\text{C}$  NMR spectrum of **8** (151 MHz,  $\text{CDCl}_3$ )

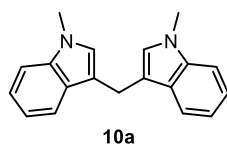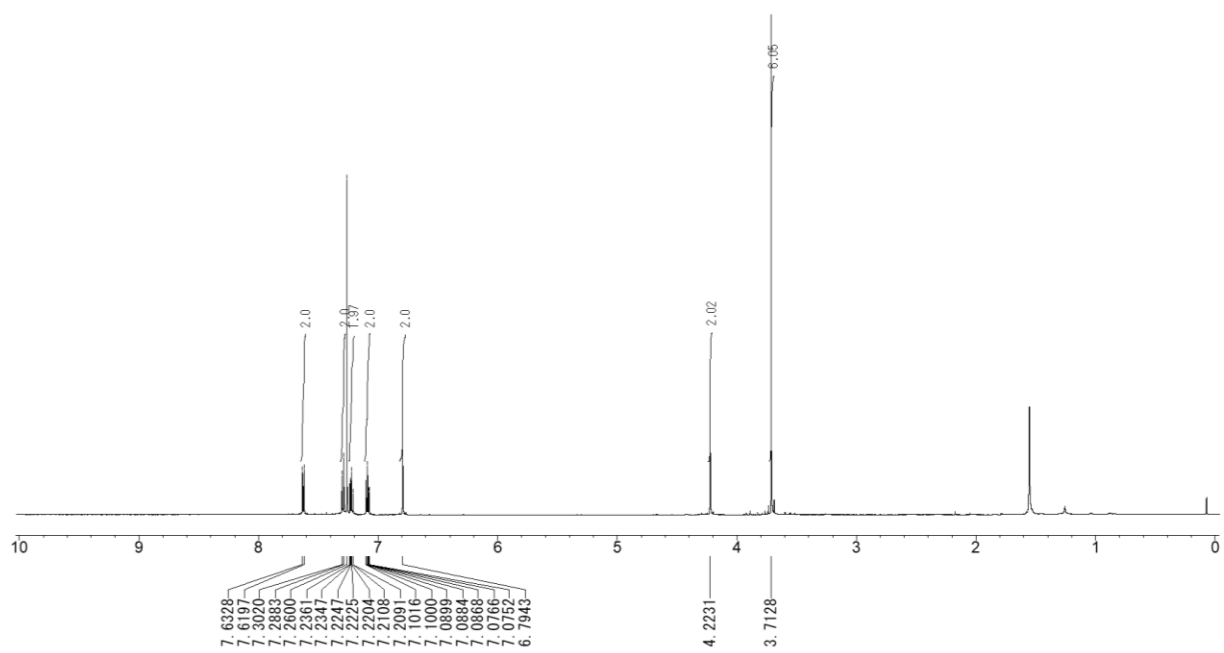

<sup>1</sup>H NMR spectrum of **10a** (600 MHz, CDCl<sub>3</sub>)

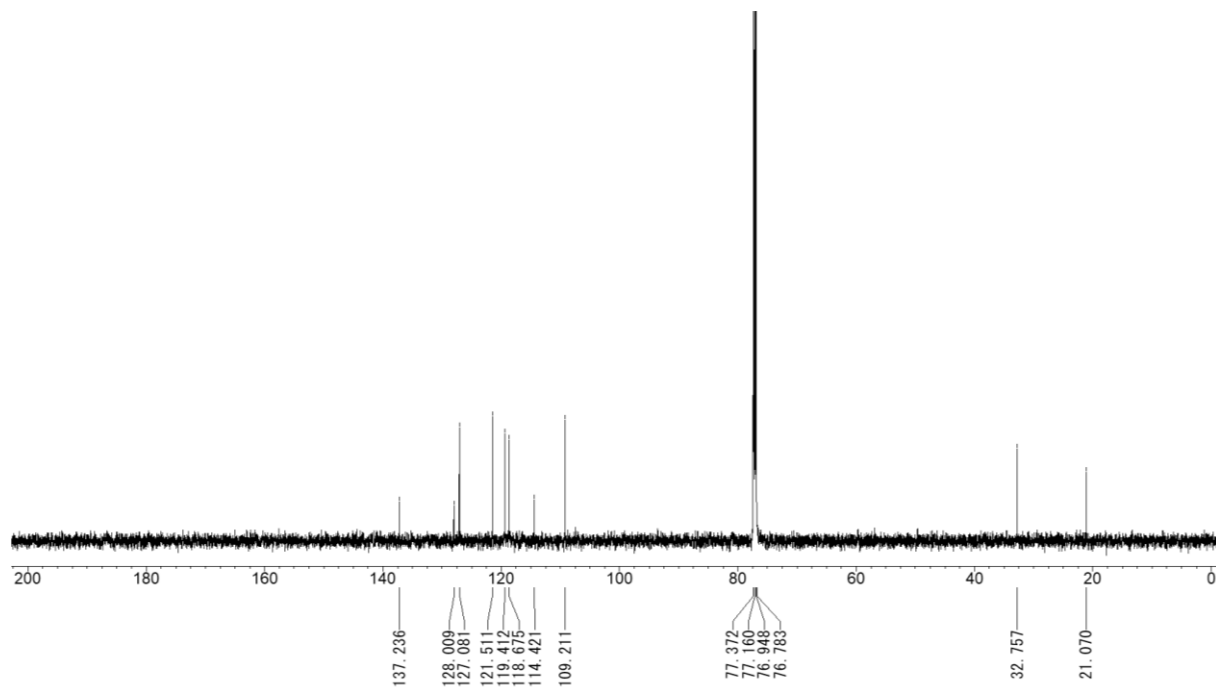

$^{13}\text{C}$  NMR spectrum of **10a** (151 MHz,  $\text{CDCl}_3$ )

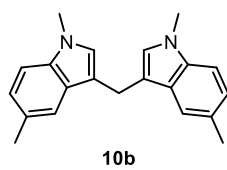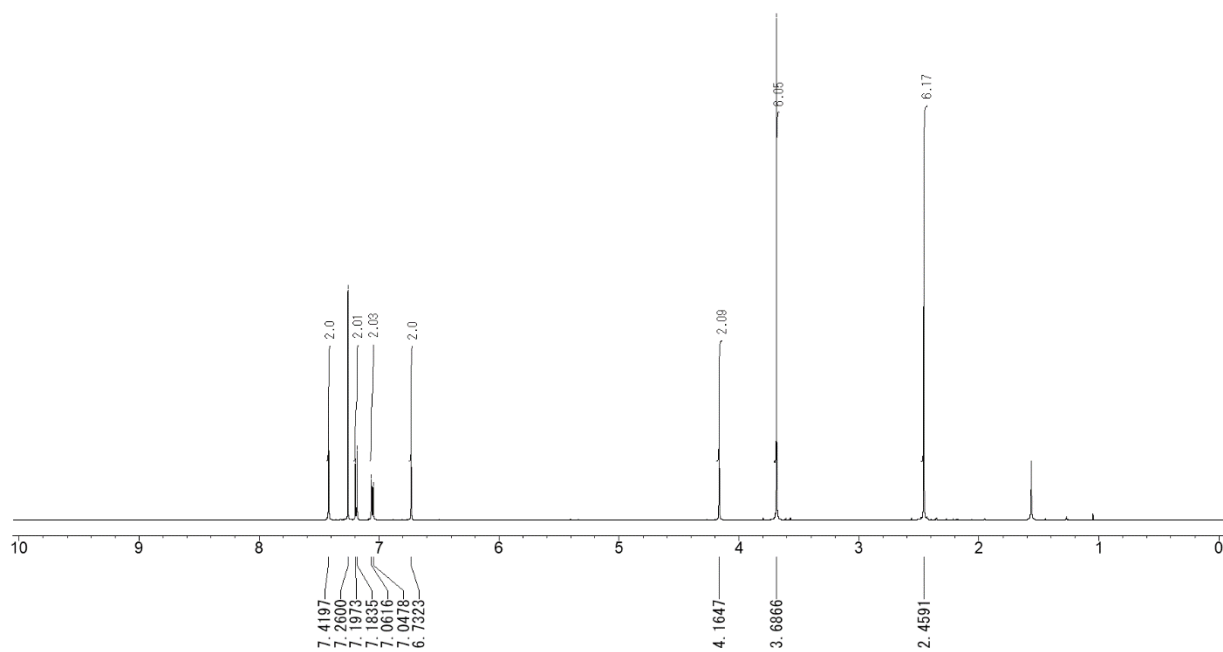

<sup>1</sup>H NMR spectrum of **10b** (600 MHz, CDCl<sub>3</sub>)



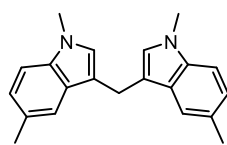

**10b**

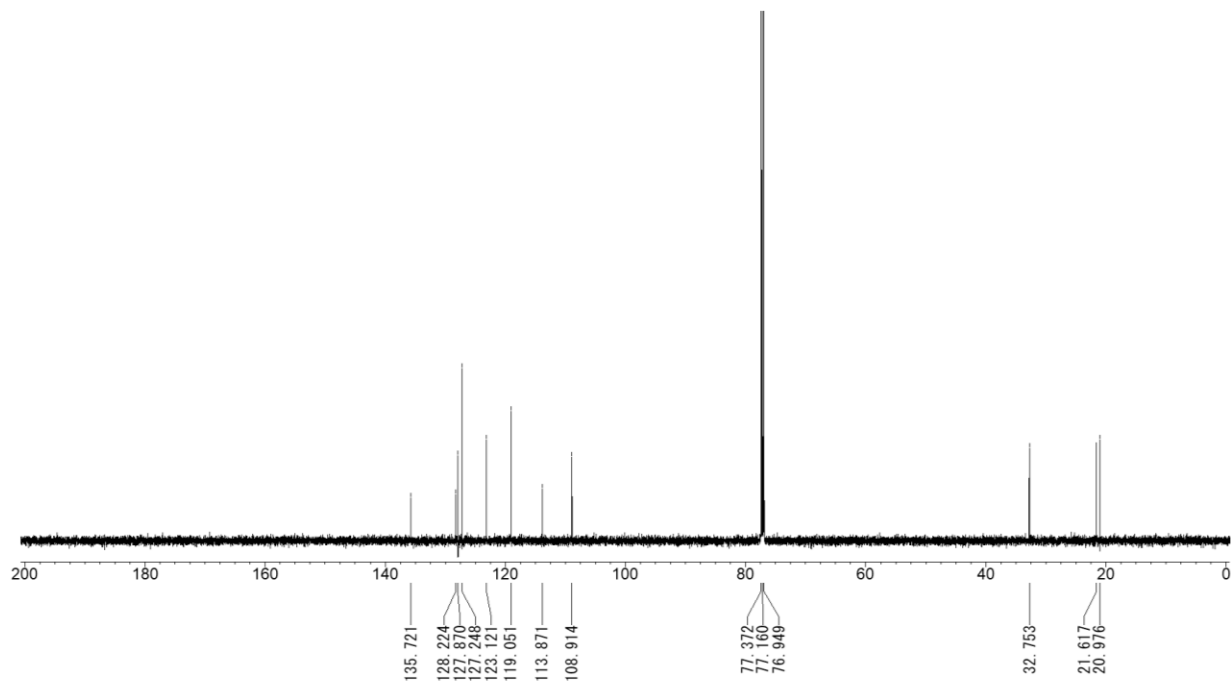

<sup>13</sup>C NMR spectrum of **10b** (151 MHz, CDCl<sub>3</sub>)

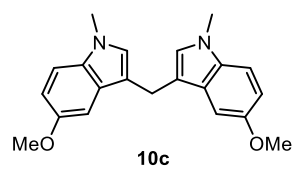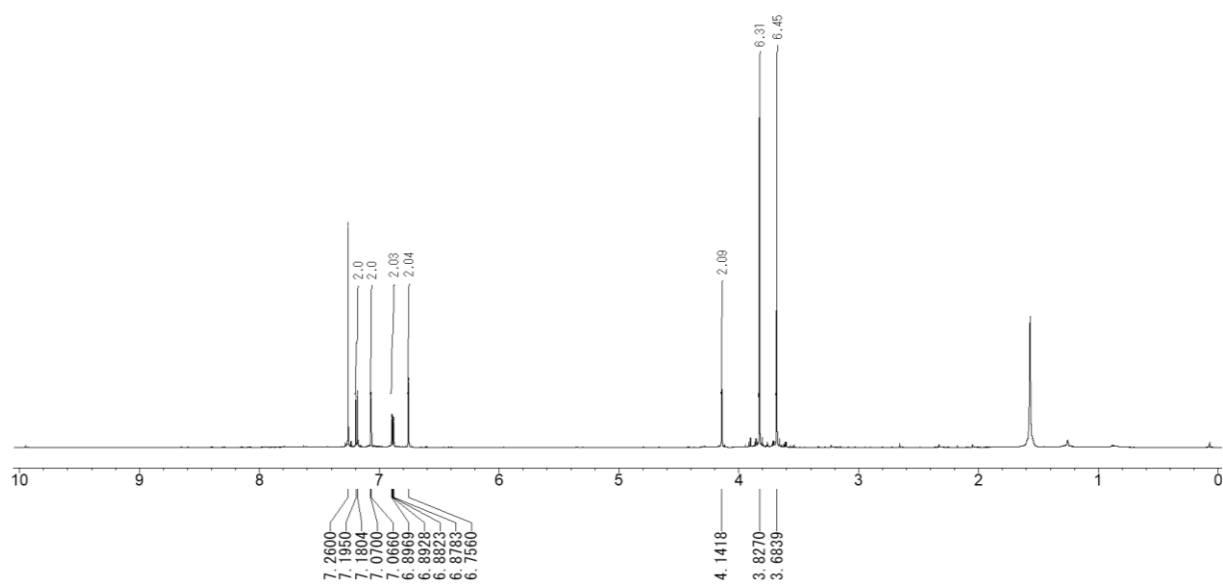

$^1\text{H}$  NMR spectrum of **10c** (600 MHz,  $\text{CDCl}_3$ )

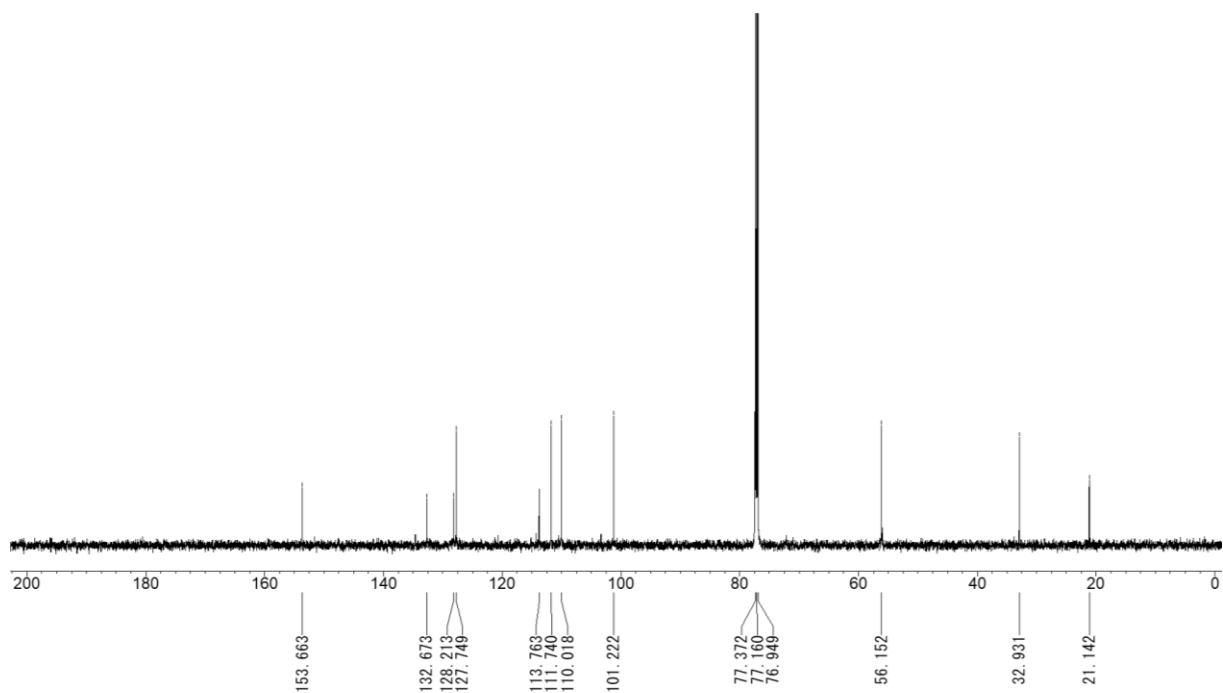

$^{13}\text{C}$  NMR spectrum of **10c** (151 MHz,  $\text{CDCl}_3$ )

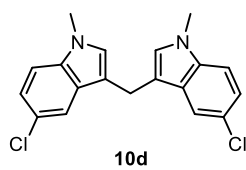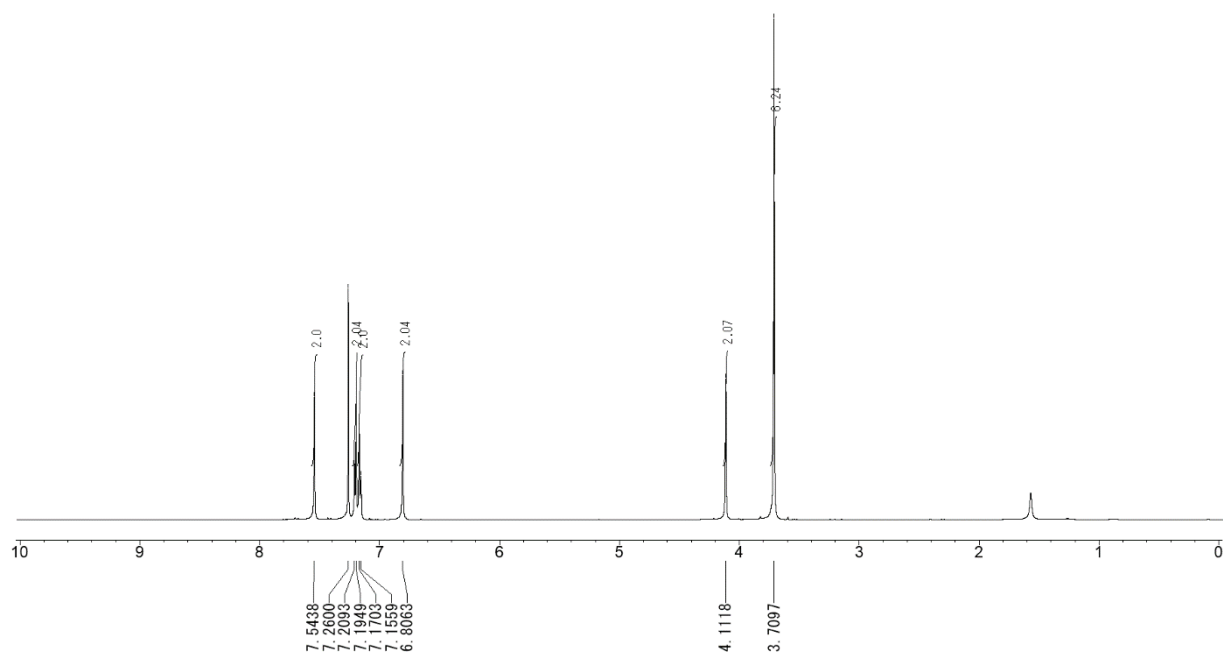

<sup>1</sup>H NMR spectrum of **10d** (600 MHz, CDCl<sub>3</sub>)

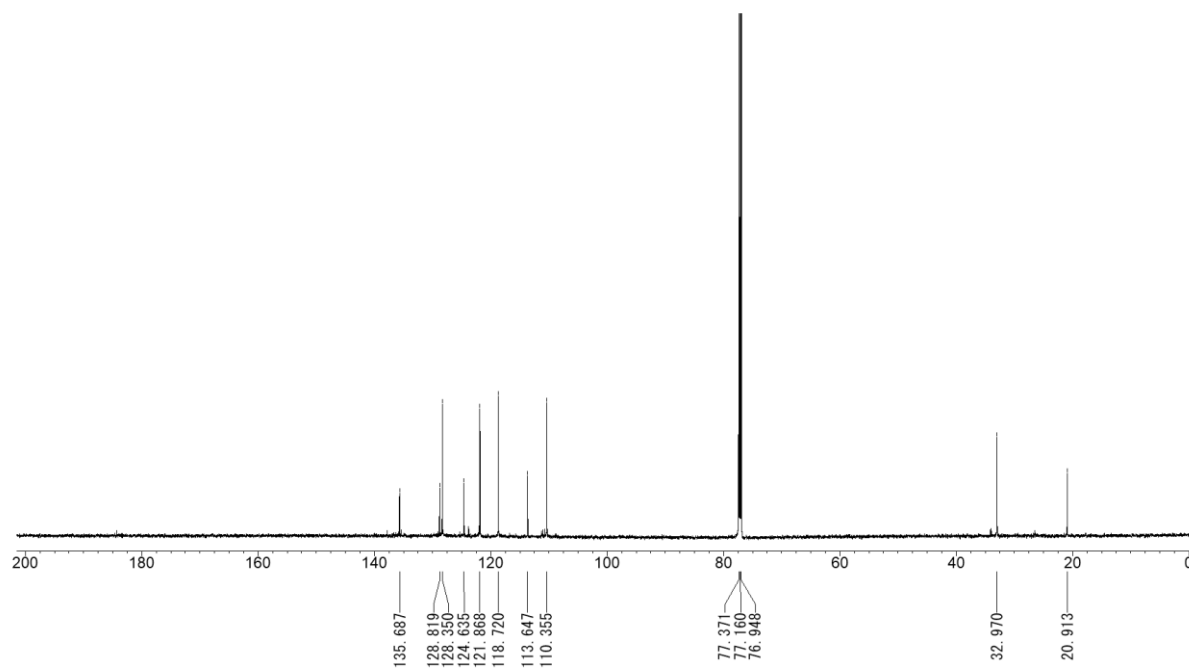

<sup>13</sup>C NMR spectrum of **10d** (151 MHz, CDCl<sub>3</sub>)

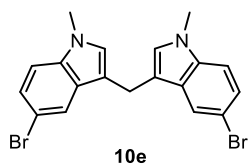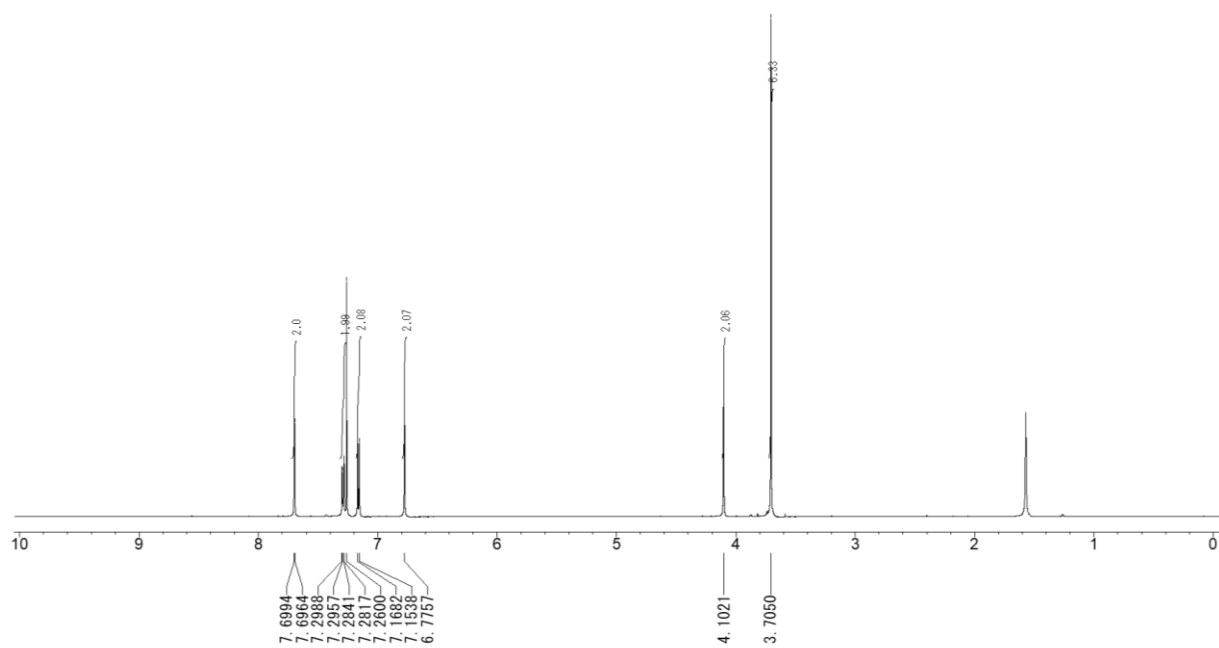

<sup>1</sup>H NMR spectrum of **10e** (600 MHz, CDCl<sub>3</sub>)

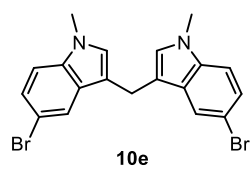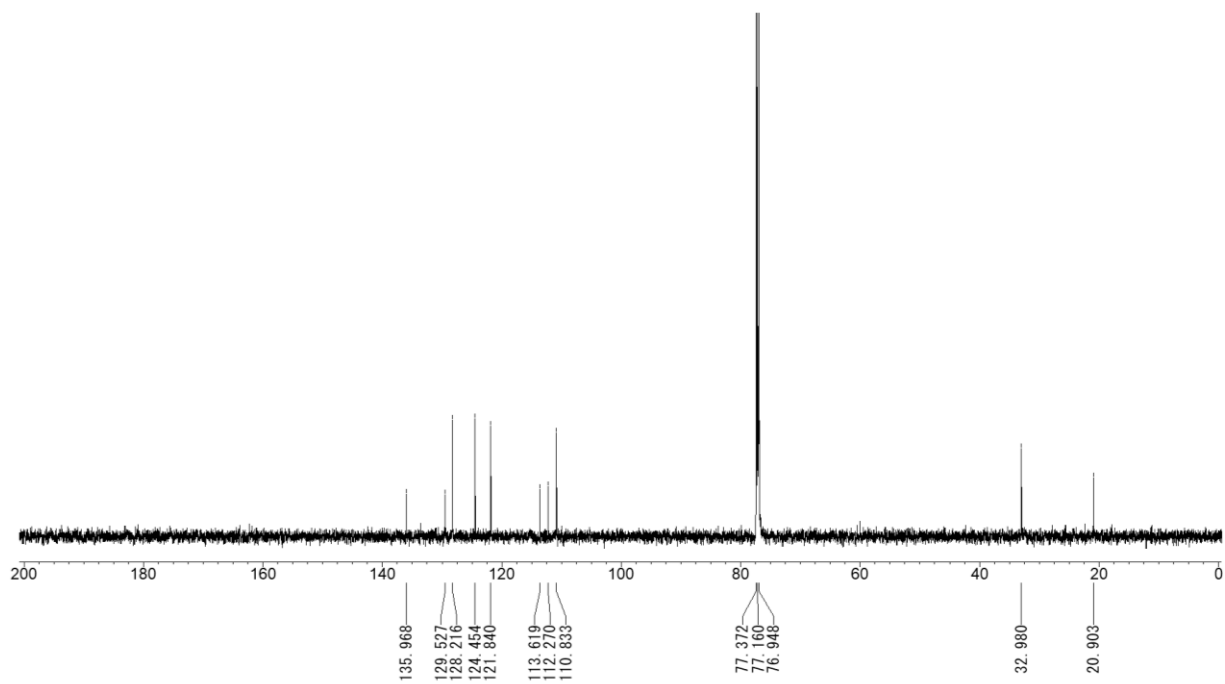

<sup>13</sup>C NMR spectrum of **10e** (151 MHz, CDCl<sub>3</sub>)

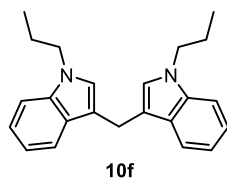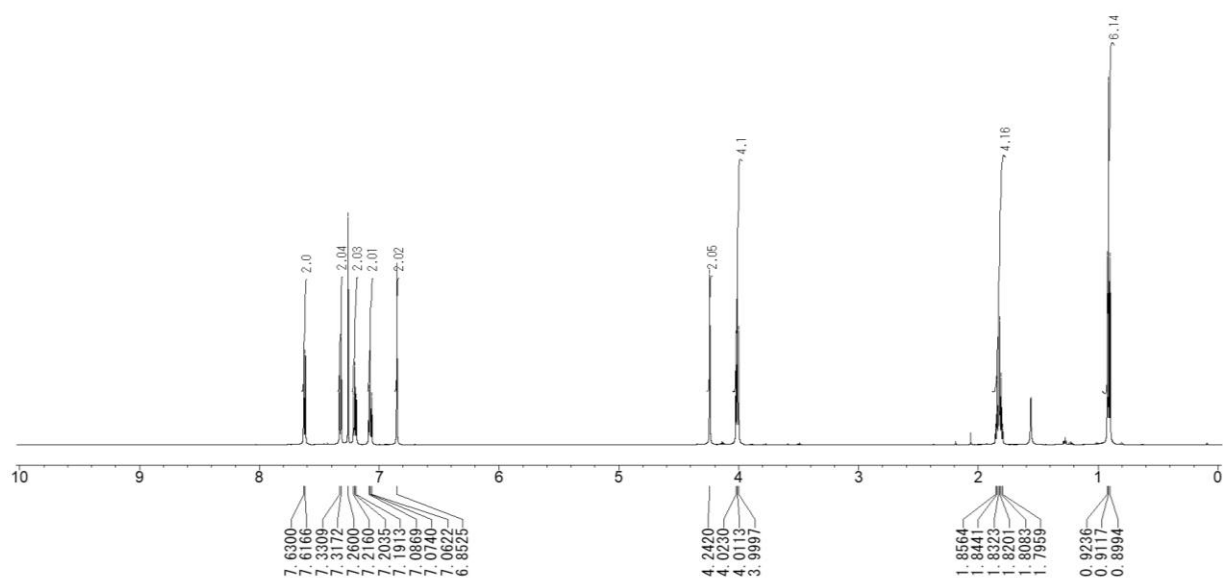

<sup>1</sup>H NMR spectrum of **10f** (600 MHz, CDCl<sub>3</sub>)



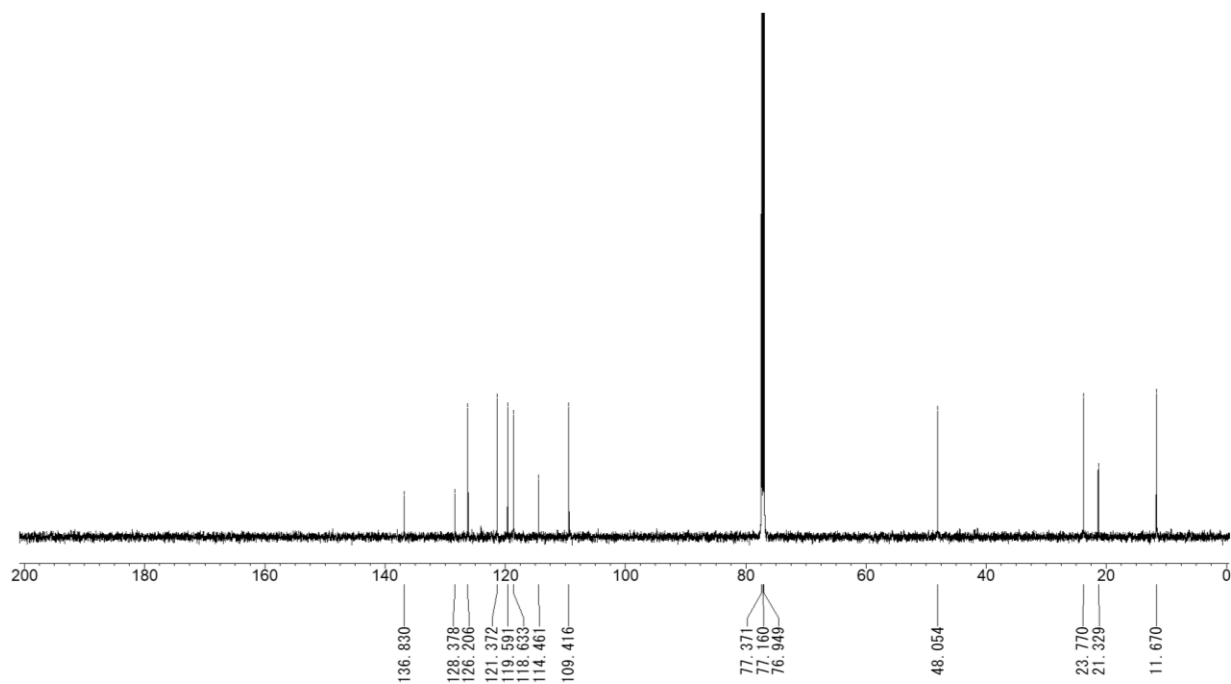

<sup>13</sup>C NMR spectrum of **10f** (151 MHz, CDCl<sub>3</sub>)

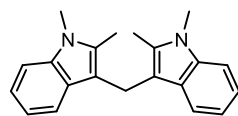

10g

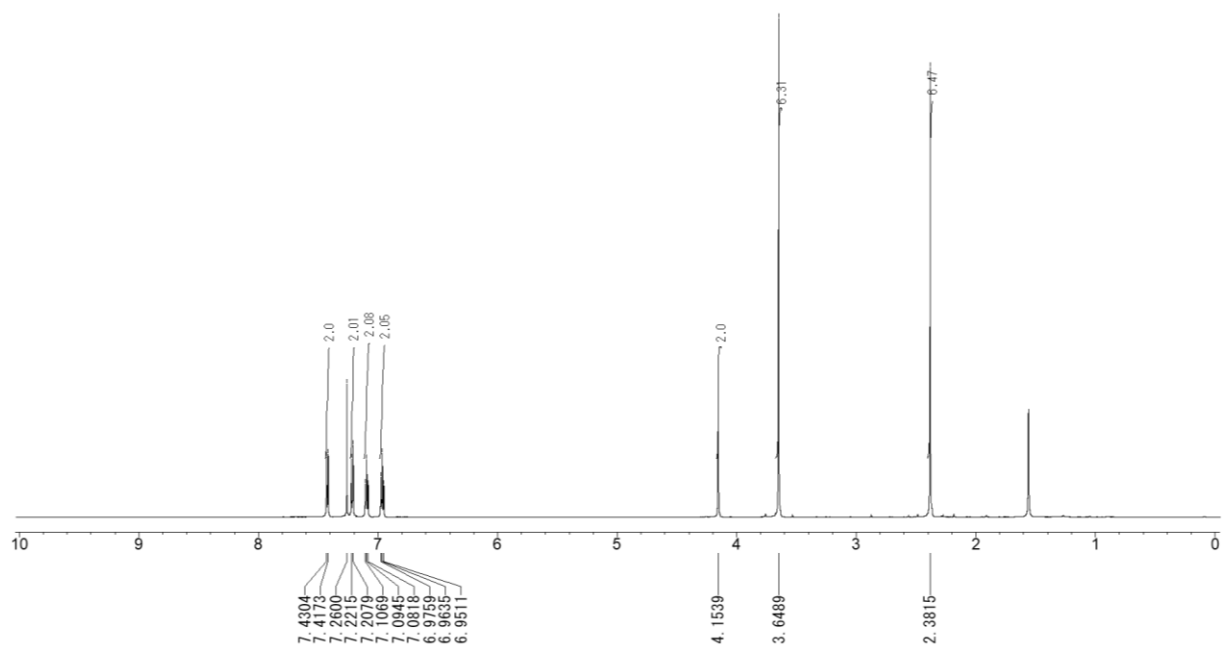

$^1\text{H}$  NMR spectrum of **10g** (600 MHz,  $\text{CDCl}_3$ )

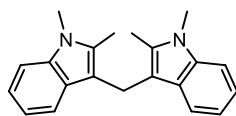

10g

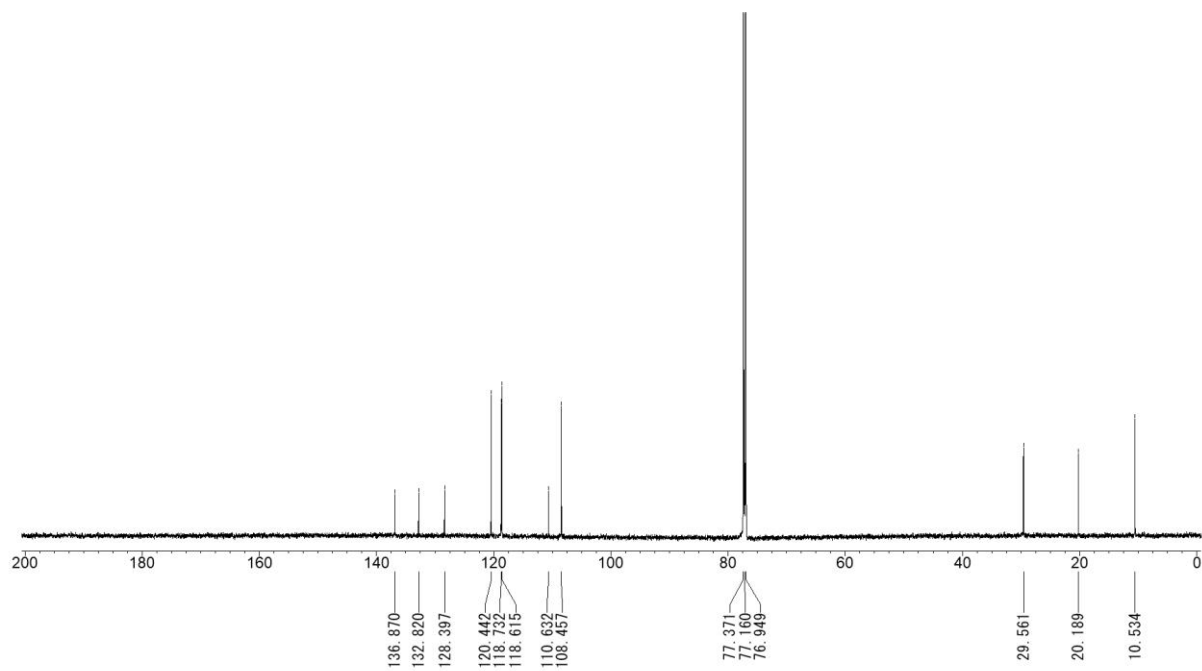

<sup>13</sup>C NMR spectrum of **10g** (151 MHz, CDCl<sub>3</sub>)

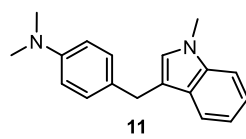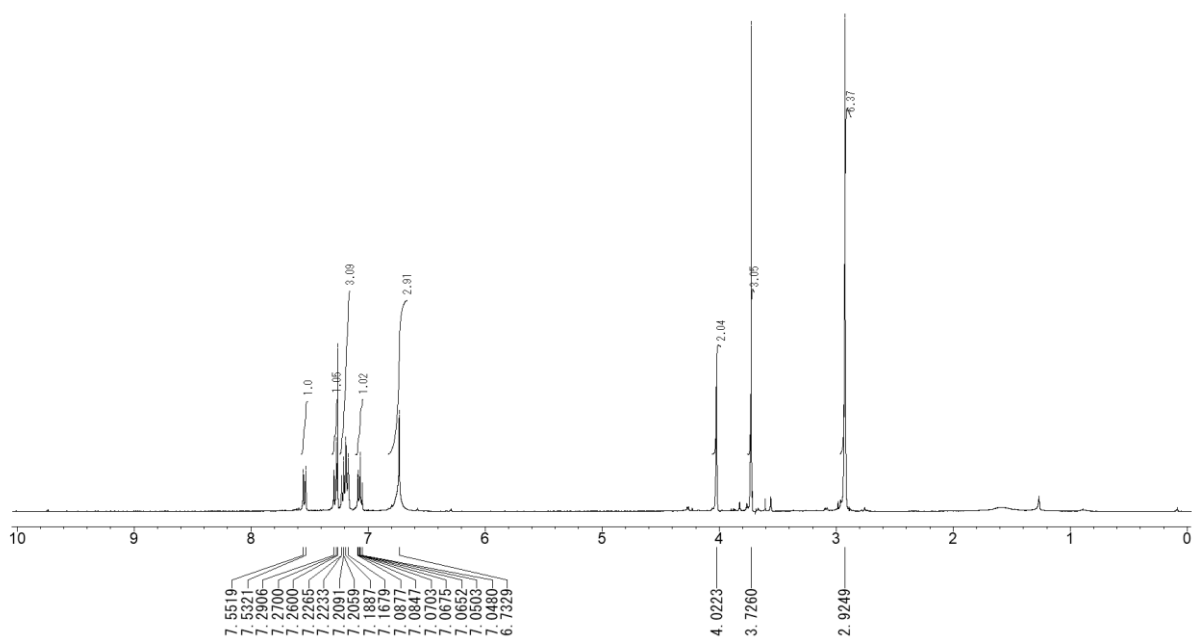

<sup>1</sup>H NMR spectrum of 11 (400 MHz, CDCl<sub>3</sub>)

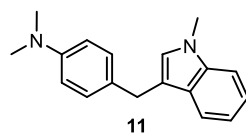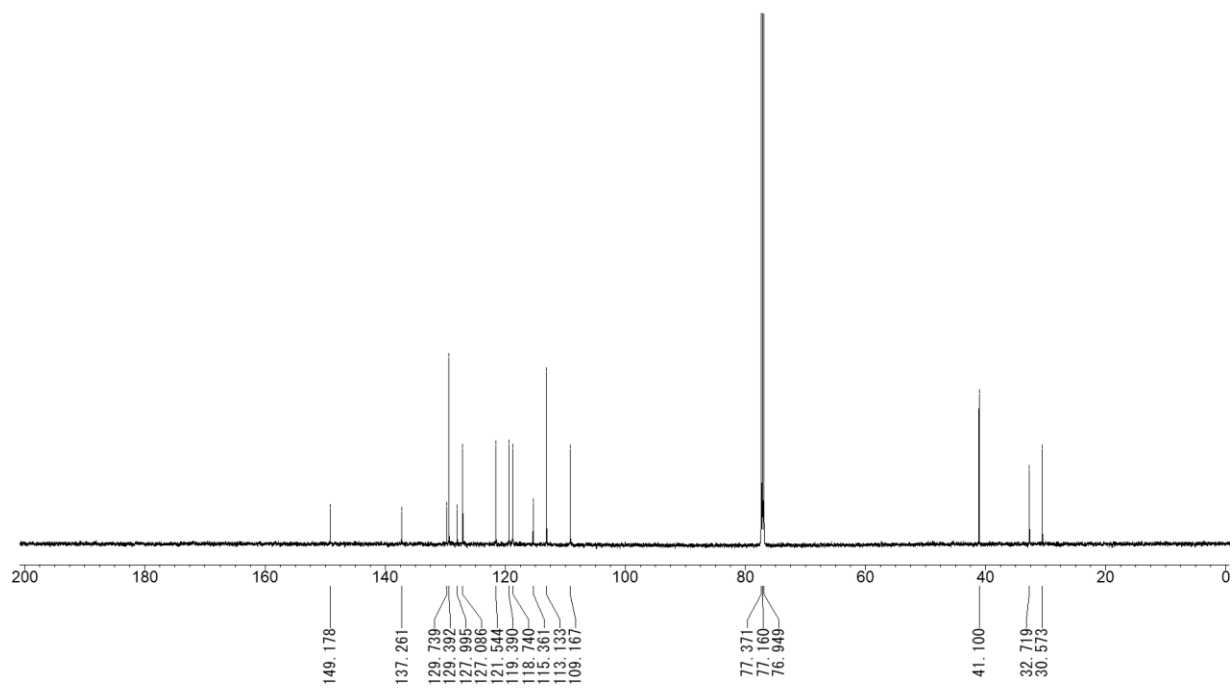

$^{13}\text{C}$  NMR spectrum of **11** (151 MHz,  $\text{CDCl}_3$ )

## 6. Coordinates of optimized structures

### Coordinates of Zn<sup>II</sup> complex 1<sub>SI</sub> in Fig. S10.

|    |           |           |           |
|----|-----------|-----------|-----------|
| Zn | -4.624220 | 0.255814  | -0.074613 |
| Zn | -1.496302 | -0.140358 | 0.299474  |
| Zn | 2.139647  | 3.611482  | -0.423999 |
| Zn | 1.587425  | 0.084914  | 0.076406  |
| Zn | 1.854601  | -3.385646 | -0.797451 |
| O  | -3.044155 | 1.418332  | 0.440946  |
| O  | 0.155824  | 3.401488  | -0.069152 |
| O  | 2.926662  | 1.715411  | -0.360226 |
| O  | 2.728748  | -1.449440 | -0.975207 |
| O  | -0.112621 | -3.116297 | -0.613425 |
| O  | -3.172808 | -1.089632 | -0.645763 |
| O  | -0.047957 | 0.272157  | -0.779525 |
| N  | -4.942539 | 0.093820  | 2.159423  |
| N  | -6.257125 | -1.249995 | 0.199522  |
| N  | 1.705114  | 3.795541  | -2.594440 |
| N  | 4.102844  | 4.296652  | -1.493725 |
| N  | 3.068408  | 3.925523  | 1.584258  |
| N  | 1.822500  | 5.821318  | 0.139809  |
| N  | 1.863802  | -3.418731 | -3.069095 |
| N  | 1.408343  | -5.614546 | -1.549178 |
| N  | 1.838405  | -4.203531 | 1.283495  |
| N  | 3.927361  | -4.154653 | -0.403959 |
| N  | -4.895841 | 0.561908  | -2.315756 |
| N  | -6.193650 | 1.871152  | -0.325346 |
| C  | -2.475426 | 3.619303  | 1.145035  |
| C  | -3.018479 | 2.343073  | 1.393598  |
| C  | -3.545861 | 2.039569  | 2.709705  |
| C  | -3.477859 | 2.992787  | 3.711890  |
| C  | -2.904600 | 4.264767  | 3.501433  |
| C  | -2.846128 | 5.235734  | 4.538184  |
| C  | -2.313043 | 6.483542  | 4.312010  |
| C  | -1.816293 | 6.805283  | 3.023388  |
| C  | -1.856195 | 5.885028  | 1.999414  |
| C  | -2.397068 | 4.580042  | 2.196284  |

|   |           |           |           |
|---|-----------|-----------|-----------|
| C | -2.133511 | 3.996350  | -0.266714 |
| C | -0.841354 | 3.740758  | -0.816077 |
| C | -0.714780 | 3.888411  | -2.268237 |
| C | -1.722034 | 4.481045  | -3.010136 |
| C | -2.915662 | 4.945921  | -2.424777 |
| C | -3.877544 | 5.679137  | -3.168523 |
| C | -5.040550 | 6.130607  | -2.584422 |
| C | -5.277070 | 5.840334  | -1.215240 |
| C | -4.369964 | 5.119501  | -0.471745 |
| C | -3.134526 | 4.656412  | -1.032395 |
| C | -4.141379 | 0.721620  | 3.048324  |
| C | -5.551634 | -1.061814 | 2.498002  |
| C | -5.346540 | -1.684394 | 3.728015  |
| C | -4.491969 | -1.067241 | 4.640093  |
| C | -3.912380 | 0.148360  | 4.314650  |
| C | -6.469632 | -1.629293 | 1.474237  |
| C | -7.048757 | -1.717630 | -0.772582 |
| C | -8.118475 | -2.574352 | -0.525650 |
| C | -8.365908 | -2.951454 | 0.794549  |
| C | -7.533941 | -2.478821 | 1.804529  |
| C | 0.475113  | 3.465046  | -3.033953 |
| C | 2.786578  | 3.610548  | -3.380024 |
| C | 2.700690  | 3.006348  | -4.632502 |
| C | 1.443268  | 2.580323  | -5.067389 |
| C | 0.327468  | 2.816639  | -4.279479 |
| C | 4.060955  | 4.146493  | -2.829269 |
| C | 5.197848  | 4.805509  | -0.923461 |
| C | 6.308752  | 5.218374  | -1.658765 |
| C | 6.265879  | 5.083829  | -3.045557 |
| C | 5.131513  | 4.538556  | -3.641427 |
| C | 4.895755  | 0.400571  | -0.407936 |
| C | 4.079926  | 1.367658  | 0.205011  |
| C | 4.469174  | 1.917885  | 1.484914  |
| C | 5.647441  | 1.504347  | 2.074074  |
| C | 6.486466  | 0.530408  | 1.485951  |
| C | 7.689536  | 0.110958  | 2.113672  |
| C | 8.492207  | -0.850730 | 1.542037  |

|   |           |           |           |
|---|-----------|-----------|-----------|
| C | 8.107515  | -1.431407 | 0.309421  |
| C | 6.947743  | -1.041653 | -0.325212 |
| C | 6.094736  | -0.044759 | 0.232047  |
| C | 4.536278  | -0.095389 | -1.777836 |
| C | 3.452176  | -0.981492 | -1.983464 |
| C | 3.119318  | -1.344573 | -3.348511 |
| C | 3.880086  | -0.881577 | -4.406495 |
| C | 4.996373  | -0.041811 | -4.221530 |
| C | 5.792038  | 0.386673  | -5.318541 |
| C | 6.882811  | 1.203868  | -5.127254 |
| C | 7.202547  | 1.629070  | -3.813897 |
| C | 6.442771  | 1.236773  | -2.733944 |
| C | 5.315798  | 0.371078  | -2.885801 |
| C | 3.638279  | 2.891747  | 2.235375  |
| C | 2.464263  | 4.917477  | 2.274881  |
| C | 2.335430  | 4.879514  | 3.661683  |
| C | 2.843851  | 3.769808  | 4.339413  |
| C | 3.507960  | 2.777706  | 3.634303  |
| C | 1.974454  | 6.059787  | 1.455233  |
| C | 1.395072  | 6.798058  | -0.665415 |
| C | 1.112910  | 8.084047  | -0.207330 |
| C | 1.291180  | 8.349831  | 1.150354  |
| C | 1.724962  | 7.329771  | 1.992987  |
| C | 2.001972  | -2.246017 | -3.716517 |
| C | 1.027897  | -4.358485 | -3.557795 |
| C | 0.223445  | -4.136568 | -4.674958 |
| C | 0.282965  | -2.885944 | -5.288169 |
| C | 1.183491  | -1.940147 | -4.820901 |
| C | 1.037954  | -5.660171 | -2.839029 |
| C | 1.444242  | -6.746421 | -0.840338 |
| C | 1.135912  | -7.992136 | -1.385853 |
| C | 0.777630  | -8.050101 | -2.732287 |
| C | 0.724737  | -6.870873 | -3.470678 |
| C | -2.341346 | -3.791764 | -0.230750 |
| C | -0.982384 | -3.681289 | 0.171358  |
| C | -0.621121 | -4.206033 | 1.485245  |
| C | -1.583301 | -4.833793 | 2.261135  |



|   |           |           |           |
|---|-----------|-----------|-----------|
| C | -2.918201 | -4.994479 | 1.848755  |
| C | -3.862094 | -5.691891 | 2.648553  |
| C | -5.157513 | -5.879055 | 2.222311  |
| C | -5.547811 | -5.360542 | 0.960869  |
| C | -4.659422 | -4.666213 | 0.169982  |
| C | -3.304294 | -4.454741 | 0.576428  |
| C | -2.772081 | -3.254952 | -1.561557 |
| C | -3.182755 | -1.911876 | -1.681495 |
| C | -3.637021 | -1.436069 | -2.973780 |
| C | -3.703251 | -2.301551 | -4.054087 |
| C | -3.356129 | -3.662303 | -3.943446 |
| C | -3.505717 | -4.560675 | -5.035513 |
| C | -3.211649 | -5.898600 | -4.899367 |
| C | -2.745286 | -6.382064 | -3.649251 |
| C | -2.575312 | -5.531990 | -2.578942 |
| C | -2.878123 | -4.139621 | -2.676266 |
| C | 0.735469  | -4.148231 | 2.066752  |
| C | 3.057451  | -4.414802 | 1.830433  |
| C | 3.235780  | -4.555495 | 3.204866  |
| C | 2.128516  | -4.361760 | 4.035609  |
| C | 0.885355  | -4.124767 | 3.475568  |
| C | 4.190595  | -4.514041 | 0.866879  |
| C | 4.884370  | -4.240804 | -1.334285 |
| C | 6.166718  | -4.704519 | -1.053782 |
| C | 6.454145  | -5.080712 | 0.258187  |
| C | 5.461196  | -4.986246 | 1.227620  |
| C | -4.092114 | -0.047639 | -3.213238 |
| C | -5.464344 | 1.748429  | -2.614023 |
| C | -5.213463 | 2.420915  | -3.809308 |
| C | -4.328559 | 1.836933  | -4.715357 |
| C | -3.771819 | 0.600684  | -4.424664 |
| C | -6.391705 | 2.294273  | -1.586619 |
| C | -6.983207 | 2.325031  | 0.654338  |
| C | -8.034937 | 3.209477  | 0.423581  |
| C | -8.269597 | 3.626507  | -0.886186 |
| C | -7.438518 | 3.168077  | -1.904323 |
| O | -1.643344 | -0.948679 | 2.130312  |

|   |           |           |           |
|---|-----------|-----------|-----------|
| C | -1.136531 | -0.805702 | 3.312866  |
| C | -0.440354 | 0.519668  | 3.616949  |
| O | -1.186343 | -1.684396 | 4.195027  |
| H | -3.892440 | 2.774021  | 4.693368  |
| H | -3.235401 | 4.970319  | 5.519380  |
| H | -2.275555 | 7.220290  | 5.110509  |
| H | -1.401682 | 7.793747  | 2.840604  |
| H | -1.478220 | 6.142005  | 1.015448  |
| H | -1.573758 | 4.645001  | -4.076295 |
| H | -3.665846 | 5.892918  | -4.215689 |
| H | -5.759806 | 6.713686  | -3.154459 |
| H | -6.188522 | 6.198796  | -0.742111 |
| H | -4.573177 | 4.922375  | 0.574597  |
| H | -5.782163 | -2.654114 | 3.939382  |
| H | -4.255622 | -1.546860 | 5.584298  |
| H | -3.218483 | 0.622330  | 4.996629  |
| H | -6.806050 | -1.384632 | -1.777627 |
| H | -8.737002 | -2.928091 | -1.343855 |
| H | -9.198321 | -3.606457 | 1.036172  |
| H | -7.714623 | -2.748819 | 2.838359  |
| H | 3.589759  | 2.821855  | -5.224314 |
| H | 1.343540  | 2.065153  | -6.019355 |
| H | -0.658110 | 2.488973  | -4.587534 |
| H | 5.170380  | 4.880510  | 0.159743  |
| H | 7.176133  | 5.632206  | -1.154773 |
| H | 7.105147  | 5.399196  | -3.659039 |
| H | 5.073132  | 4.431207  | -4.718338 |
| H | 5.946161  | 1.926613  | 3.030356  |
| H | 7.961870  | 0.564180  | 3.064824  |
| H | 9.409862  | -1.166106 | 2.031695  |
| H | 8.736597  | -2.194717 | -0.143324 |
| H | 6.666413  | -1.497985 | -1.267769 |
| H | 3.637423  | -1.200040 | -5.418059 |
| H | 5.524633  | 0.043583  | -6.316690 |
| H | 7.495133  | 1.517192  | -5.969021 |
| H | 8.060710  | 2.277742  | -3.654588 |
| H | 6.704251  | 1.585148  | -1.742359 |

|   |           |           |           |
|---|-----------|-----------|-----------|
| H | 1.803527  | 5.659565  | 4.194191  |
| H | 2.707108  | 3.676837  | 5.413095  |
| H | 3.861543  | 1.876021  | 4.115361  |
| H | 1.273840  | 6.527231  | -1.710642 |
| H | 0.767834  | 8.848485  | -0.895724 |
| H | 1.096939  | 9.341226  | 1.550321  |
| H | 1.882604  | 7.520523  | 3.048179  |
| H | -0.479894 | -4.888177 | -5.012912 |
| H | -0.374895 | -2.657674 | -6.121978 |
| H | 1.257582  | -0.960076 | -5.276933 |
| H | 1.729676  | -6.639705 | 0.201925  |
| H | 1.180508  | -8.885424 | -0.771241 |
| H | 0.543311  | -9.000854 | -3.203169 |
| H | 0.458300  | -6.888005 | -4.521133 |
| H | -1.303557 | -5.263449 | 3.218210  |
| H | -3.533545 | -6.083691 | 3.609625  |
| H | -5.870265 | -6.426079 | 2.834505  |
| H | -6.565123 | -5.517447 | 0.609455  |
| H | -4.981947 | -4.282652 | -0.791866 |
| H | -4.088678 | -1.945155 | -5.007126 |
| H | -3.876072 | -4.169485 | -5.981842 |
| H | -3.346916 | -6.582248 | -5.733820 |
| H | -2.522027 | -7.439911 | -3.533577 |
| H | -2.219882 | -5.915372 | -1.629014 |
| H | 4.215437  | -4.727958 | 3.633111  |
| H | 2.249255  | -4.356673 | 5.113842  |
| H | 0.033800  | -3.860138 | 4.089793  |
| H | 4.599913  | -3.922719 | -2.333075 |
| H | 6.913163  | -4.761574 | -1.839093 |
| H | 7.441660  | -5.445269 | 0.526299  |
| H | 5.670216  | -5.284978 | 2.247602  |
| H | -5.632620 | 3.402844  | -3.991105 |
| H | -4.072118 | 2.352658  | -5.636727 |
| H | -3.076164 | 0.127636  | -5.107475 |
| H | -6.754194 | 1.955584  | 1.649290  |
| H | -8.651974 | 3.551646  | 1.247856  |
| H | -9.089309 | 4.302124  | -1.113817 |

|    |           |           |           |
|----|-----------|-----------|-----------|
| H  | -7.605239 | 3.471722  | -2.931168 |
| H  | -0.383653 | 0.685698  | 4.697686  |
| H  | -0.944324 | 1.363626  | 3.138498  |
| H  | 0.577804  | 0.472784  | 3.206035  |
| O  | 2.194949  | -0.048055 | 1.960714  |
| C  | 2.964334  | -0.931379 | 2.596218  |
| H  | 2.425591  | -1.843516 | 2.905606  |
| H  | 3.879160  | -1.222329 | 2.044921  |
| O  | 3.472374  | -0.332734 | 3.869026  |
| Si | 4.179158  | -1.098484 | 5.138537  |
| H  | 5.043454  | -2.251091 | 4.719319  |
| H  | 5.085545  | -0.112961 | 5.804859  |
| C  | 2.919711  | -1.704178 | 6.401069  |
| C  | 3.306528  | -2.238037 | 7.644651  |
| C  | 1.546066  | -1.645170 | 6.108796  |
| C  | 2.357001  | -2.697466 | 8.559446  |
| H  | 4.362252  | -2.295803 | 7.909804  |
| C  | 0.590045  | -2.109544 | 7.016333  |
| H  | 1.198843  | -1.250380 | 5.160289  |
| C  | 0.995067  | -2.634953 | 8.244565  |
| H  | 2.676906  | -3.104405 | 9.516416  |
| H  | -0.456463 | -2.055694 | 6.730367  |
| H  | 0.256815  | -2.996865 | 8.957111  |

## 7. References

- S1 D. Zhao, Y. Wang, M.-X. Zhu, Q. Shen, L. Zhang, Y. Du and J.-X. Li, *RSC Adv.*, 2013, **3**, 10272–10276.
- S2 M. L. Deb, P. J. Borpatra, P. J. Sakia and P. K. Baruah, *Org. Biomol. Chem.*, 2017, **15**, 1435–1443.
- S3 F. Pu, Y. Li, Y.-H. Song, J. Xiao, Z.-W. Liu, C. Wang, Z.-T. Liu, J.-G. Chen and J. Lu, *Adv. Synth. Catal.*, 2016, **358**, 539–542.
- S4 M. Yan, R. C. Hider and Y. Ma, *Org. Chem. Front.*, 2019, **6**, 1168–1172.
- S5 S. Yang, W. Tang, Z. Yang and J. Xu, *ACS Catal.*, 2018, **8**, 9320–9326.
- S6 G. R. Fulmer, A. J. M. Miller, N. H. Sherden, H. E. Gottlieb, A. Nudelman, B. M. Stoltz, J. E. Bercaw and K. I. Goldberg, *Organometallics*, 2010, **29**, 2176–2179.
- S7 P. J. Black, M. G. Edwards and J. M. J. Williams, *Eur. J. Org. Chem.*, 2006, **2006**, 4367–4378.
- S8 (a) K. Tokmic, C. R. Markus, L. Zhu and A. R. Fout, *J. Am. Chem. Soc.*, 2016, **138**, 11907–11913; (b) J. Matthes, T. Pery, S. Gründemann, G. Buntkowsky, S. Sabo-Etienne, B. Chaudret and H.-H. Limbach, *J. Am. Chem. Soc.*, 2004, **126**, 8366–8367; (c) G. Laurenczy, M. Faure, L. Vieille-Petit, G. Süß-Fink and T. R. Ward, *Adv. Synth. Catal.*, 2002, **344**, 1073–1077.
